# Supplementary material
Source: PubMed Central journal article supplement (PMC7887077)
Supplement: NIHMS1659107-supplement-003128_-_Supplemental_Material.pdf [file NIHMS1659107-supplement-003128_-_Supplemental_Material.pdf]

## **SUPPLEMENTAL MATERIAL**

### **Methods**

**Study population**

**Polygenic risk score derivation**

**Healthy lifestyle factors**

**Clinical status**

**Statistical analysis**

### **Supplementary References**

#### **Supplementary Tables**

**Supplementary Table 1.** Definition of lifestyle factors in the UK Biobank.

**Supplementary Table 2.** Diagnosis of diseases in the UK Biobank.

**Supplementary Table 3.** Performance of polygenic risk score by different methods.

**Supplementary Table 4.** Sample size of subgroups stratified by PRS and combined lifestyle.

**Supplementary Table 5.** Association of PRS and combined lifestyle factors with coronary artery disease, atrial fibrillation, and type 2 diabetes.

**Supplementary Table 6.** Minimal detectable interaction effect between AnnoPred PRS and lifestyle with 80% power for coronary artery diseases, atrial fibrillation and type 2 diabetes.

**Supplementary Table 7.** Interactions of PRS and combined lifestyle factors for coronary artery disease, atrial fibrillation, and type 2 diabetes in terms of relative risks.

**Supplementary Table 8.** Absolute risk reduction from healthy lifestyle for coronary artery disease, atrial fibrillation, and type 2 diabetes.

**Supplementary Table 9.** Levels of lipid within subgroups stratified by PRS and combined lifestyle.

**Supplementary Table 10.** Minimal detectable interaction effect between AnnoPred PRS and lifestyle with 80% power for lipid levels.

**Supplementary Table 11.** Interactions of PRS and combined lifestyle factors for lipid levels.

#### **Supplementary Figures**

**Supplementary Figure 1.** Flowchart for the selection of the study samples from the UK Biobank.

**Supplementary Figure 2.** Flowchart for PRS derivation.

**Supplementary Figure 3.** Relative risk of coronary artery disease stratified by genetic and individual lifestyle factors.

**Supplementary Figure 4.** Relative risk of atrial fibrillation stratified by genetic and individual lifestyle factors.

**Supplementary Figure 5.** Relative risk of type 2 diabetes stratified by genetic and individual lifestyle factors.

**Supplementary Figure 6.** Absolute risk of coronary artery disease stratified by genetic and individual lifestyle factors.

**Supplementary Figure 7.** Absolute risk of atrial fibrillation stratified by genetic and individual lifestyle factors.

**Supplementary Figure 8.** Absolute risk of type 2 diabetes stratified by genetic and individual lifestyle factors.

**Supplementary Figure 9.** Levels of total cholesterol stratified by genetic and individual lifestyle factors.

**Supplementary Figure 10.** Levels of triglyceride stratified by genetic and individual lifestyle factors.

**Supplementary Figure 11.** Levels of LDL-cholesterol stratified by genetic and individual lifestyle factors.

**Supplementary Figure 12.** Relative risk of coronary artery disease, atrial fibrillation, and type 2 diabetes stratified by genetic and individual lifestyle factors in different sexes.

**Supplementary Figure 13.** Incident events of coronary artery disease, atrial fibrillation, and type 2 diabetes stratified by genetic and individual lifestyle factors in different sexes.

**Supplementary Figure 14.** Levels of lipid stratified by genetic and individual lifestyle factors in different sexes.

## **Methods**

### **Study population**

The UK Biobank (UKBB) is a large prospective study established to be a resource for research into the causes of diseases among middle-old aged adults<sup>1</sup>. The study protocol, details of the study design, and data access are available online<sup>2</sup>. In brief, a total of 502,618 participants aged 40-69 years were recruited from 22 assessment centers across the United Kingdom between 2006 and 2010. In our study, analyses were restricted to unrelated individuals of white British origin identified by a combination of self-reported ancestry and genetically confirmed ancestry based on principal component analysis of the participants' genotypes<sup>3</sup>. Exclusion criteria included lack of genetic data (sufficient DNA could not be extracted from the blood samples of ~3% of participants), discordance between reported and genotype inferred sex, poor heterozygosity or missingness, sex chromosome aneuploidy, withdrawal of informed consent, and individuals with at least one relative (Supplement Figure I). The remaining UKBB participants were then divided into a training set and a testing set according to the genotyping batch<sup>4,5</sup>, where individuals in the first 35 batches were assigned to the training set, and individuals in the other 71 batches were regarded as the testing samples.

### **Polygenic risk score derivation**

P+T denotes the LD clumping and  $p$ -value thresholding method, which was conducted using PLINK version 1.90b (using the --clump flag)<sup>1</sup>. Specifically, for each pair of single nucleotide polymorphisms (SNPs) that have a physical distance smaller than 250 kb and pairwise correlation greater than the specified  $R_T^2$  threshold, the P+T method will remove the SNP with the less significant effect-size. Of the remaining SNPs, the PRS is then built through the marginal effect-weighted sum of all variants whose statistical significance level is below a certain  $p$ -value threshold,  $P_T$ . In our study, we varied the  $P_T$  value from 1.0, 0.5, 0.05, 5E-4, 5E-6, to 5E-8, and the  $R_T^2$  value from 0.2, 0.4, 0.6, 0.8 to 1.0, resulting in a total of 30 combinations.

LDpred is a Bayesian approach that infers the posterior mean effect size of each variant from GWAS summary statistics while accounting for LD<sup>2</sup>. LDpred places an independent point-normal prior on the effect-size of each variant and shrinks it based on LD information from a reference panel. The prior has two parameters: the heritability parameter, which is estimated from GWAS summary statistics while considering LD, and the tuning parameter  $p$ , which is the proportion of causal variants. In our study, we considered  $p$  within the set of {1.0, 0.3, 0.1, 0.03, 0.01, 3E-4, 1E-4, 3E-5, 1E-5, 3E-6, 1E-6}, which is the default setting suggested by the LDpred.

PRS-CS is also a Bayesian method that infers the posterior mean effect size of each variant using GWAS summary statistics and LD<sup>3</sup>, but is distinct from previous work by placing a continuous shrinkage (CS) prior on the SNP effect sizes.

AnnoPred is a Bayesian framework leveraging diverse types of genomic and epigenomic functional annotations to improve risk prediction accuracy<sup>4</sup>. It uses an empirical prior of SNP effect size based on functional annotations of the SNPs and signal enrichment in different annotation classes estimated from GWAS summary statistics. To increase flexibility against different genetic architecture, two different priors relating the annotations with the proportion of causal SNPs and variance of effect sizes separately, are considered. The empirical prior is then

jointly modeled with GWAS summary statistics and LD estimated from an external reference panel to infer the posterior effect size of each variant. Here the fraction of causal variants is also set as a tuning parameter,  $p$ . For fair comparison with other PRS methods, we also considered  $p$  within the set of  $\{1.0, 0.3, 0.1, 0.03, 0.01, 3E-4, 1E-4, 3E-5, 1E-5, 3E-6, 1E-6\}$ . We incorporated a number of functional annotations in this study, including 53 baseline annotations for diverse genomic features (Baseline\_Annotation)<sup>5</sup>, GenoCanyon general functionality scores (GenoCanyon\_Annotation)<sup>6</sup>, GenoSkyline tissue-specific functionality scores of 7 tissue types (brain, gastrointestinal tract, lung, heart, blood, muscle, epithelial) (GenoSkyline\_Annotation)<sup>7</sup>, GenoSkyline-Plus tissue-specific functionality scores of 7 tissue types (immune, brain, cardiovascular, muscle, gastrointestinal tract, epithelial, other) (GenoSkyline-Plus\_tissue\_Annotation)<sup>8</sup>, and GenoSkyline-Plus cell-specific functionality scores of 66 cell types (GenoSkyline-Plus\_cell\_Annotation)<sup>8</sup>. Since different traits might have different annotation enrichment patterns, we trained AnnoPred PRS for each trait by comparing results based on four different tiers of annotations: 1) 53 Baseline\_Annotation + 1 GenoCanyon\_Annotation; 2) 53 Baseline\_Annotation + 1 GenoCanyon\_Annotation + 7 GenoSkyline\_Annotation; 3) 53 Baseline\_Annotation + 1 GenoCanyon\_Annotation + 7 GenoSkyline-Plus\_tissue\_Annotation; and 4) 53 Baseline\_Annotation + 1 GenoCanyon\_Annotation + 66 GenoSkyline-Plus\_cell\_Annotation. Each combination of  $p$ , prior and annotation tier would generate a candidate PRS. Considering there were 11 values of  $p$ , 2 priors and 4 tiers of annotations, 88 candidate PRS were generated from AnnoPred for each trait.

Taken together, we generated 130 candidate PRSs for each disease/trait using different methods under different tuning parameters. Since parameter tuning is required for all four of these PRS methods, for each method and its associated candidate tuning parameter(s), we estimated the effect sizes of all candidate SNPs using external GWAS summary statistics<sup>6-9</sup> and computed PRS for all individuals in the UKBB training dataset. When calculating the candidate PRS, we only kept variants shared by GWAS summary statistics and reference panel and further excluded the duplicated variants and variants whose genotyping missing rate  $> 0.01$ , minor allele frequency  $< 0.05$ , Hardy-Weinberg equilibrium  $P$  value  $< 1e-5$ , or imputation quality score  $< 0.3$ . For each binary trait, the optimal tuning parameter(s) was (were) selected based on the maximal area under the receiver operator curve (AUC) in a Cox regression model with the disease status as outcome, the onset age as follow-up time and the disease-specific candidate PRS as the predictor. For each quantitative trait, the optimal tuning parameter(s) was (were) selected based on the maximal predictive  $R^2$  in a linear regression model with the lipid levels as the outcome and the corresponding candidate PRS as the covariate. The PRS model built using the “optimal” tuning parameter(s) was then applied to the testing dataset to study the joint effects of genetic and lifestyle factors on different diseases and lipid levels.

### **Healthy lifestyle factors**

We considered four modifiable lifestyle factors according to the American Heart Association 2020 Strategic Impact Goal Guideline<sup>10</sup>: smoking, body mass index (BMI), physical activity, and diet.

Smoking status was defined as ideal if participants had never smoked, poor if they were current smokers according to the UKBB touchscreen questionnaire. Body mass index (BMI) ( $\text{kg}/\text{m}^2$ ) was calculated based on the measured weight and height. BMI between 18.5 and 25  $\text{kg}/\text{m}^2$  was

identified as ideal, BMI  $\geq 30$  kg/m<sup>2</sup> was identified as poor. The validated International Physical Activity Questionnaire<sup>11</sup> was used to ascertain the duration and intensity of physical activity for the participants in the UKBB. We defined ideal physical activity as  $\geq 150$  min/week moderate or  $\geq 75$  min/week vigorous or  $\geq 150$  min/week mixed (moderate + vigorous) activity, and poor physical activity as  $< 1$  min/week moderate or  $< 1$  min/week vigorous or  $< 1$  min/week mixed. Participants' diet information was collected using the UKBB dietary touchscreen questionnaire. This questionnaire asked twenty-nine questions about diet, most of which were about the average frequency of consumption of main foods in different food groups over the past year. We followed previous study<sup>12</sup> to define the serving sizes of the following 10 dietary components: fruit, vegetables, whole grains, fish, dairy, vegetable oils, refined grain, processed meat, unprocessed meat and sugar-sweetened beverages. We then identified participants with adequate intake of  $\geq 5$  dietary components as in ideal diet status, others as in poor diet status. More details and UKBB data fields used for the definition of each lifestyle component are available in the Supplement Table I. Overall lifestyle status was categorized as ideal (having at least 3 ideal lifestyle factors), poor (having at least 3 poor lifestyle factors), or intermediate (all other combinations).

### **Clinical status**

Identification of prevalent and incident diseases was based on both self-reports in an interview with a trained nurse, and electronic health record information including both inpatient International Classification of Diseases (ICD-10, ICD-9) diagnosis codes and the Office of Population Censuses and Surveys (OPCS-4) procedure codes (Supplement Table II). Participants with the prevalent disease were excluded from the testing set for each disease outcome. The lipid levels were measured in blood samples collected at recruitment<sup>10, 13</sup>. Participants with cholesterol-lowering medication were excluded in the lipid analyses.

### **Statistical analysis**

For each PRS method, we partitioned UKBB samples in the testing set into 10 groups based on their PRS levels. Each genetic risk defined group was further partitioned into three subgroups according to lifestyle status (ideal, intermediate, or poor). For CAD, AF, and T2D, we used the Cox proportional hazard regression model to assess the association between disease incidence and PRS and lifestyle factors. Hazard ratios (HRs) with 95% confidence intervals (CI) were calculated for the 30 different PRS/lifestyle categories relative to the intermediate PRS/lifestyle group. We adjusted for sex, age at recruitment, the first four genetic principal components, years of education (defined as the previous report<sup>14</sup>), Townsend Deprivation Index (TDI, a measure for socioeconomic status<sup>15</sup>), and self-reported annual household income. Follow-up was censored at disease diagnosis, death, or March 1<sup>st</sup>, 2017, whichever was earliest. We also calculated the absolute risk reduction (ARR)<sup>16</sup> from a healthy lifestyle for each PRS group, where the absolute risk (AR) was calculated as the incident rate of each disease in a specific group. The standard error of ARR was calculated as  $\sqrt{\left(\frac{a}{n_1}\right)\left(1 - \frac{a}{n_1}\right)/n_1 + \left(\frac{b}{n_2}\right)\left(1 - \frac{b}{n_2}\right)/n_2}$ , where  $a$  is the number of the incident events with a healthy lifestyle,  $n_1$  is the total number of individuals leading a healthy lifestyle,  $b$  is the number of incident events with a poor lifestyle, and  $n_2$  is the total number of individuals leading a poor lifestyle. For lipid levels, we summarized the mean and standard error (SD) for each of the 30 groups. We then investigated potential interactions between genetic and lifestyle factors on disease incidence and inverse normal transformed<sup>17</sup> lipid

levels by formally testing the interactions between PRS and lifestyle using regression models. For each trait, we regarded the group with <5% PRS & ideal lifestyle as the reference group, the other nine PRS categories and two lifestyle categories thus led to 18 PRS & lifestyle combinations; so, the statistical significance threshold was set at 0.0027 (0.05/18) using Bonferroni correction. To maximize the power of detecting potential interactions, we also conducted the statistical tests using continuous PRS for each trait, where we regarded the ideal lifestyle category as the reference. As there were other two alternative lifestyle categories, during these tests, we set the significance threshold as 0.025 (0.05/2). All statistical analyses were conducted using R software v.3.4.3.

### **Supplementary References**

1. Sudlow C, Gallacher J, Allen N, Beral V, Burton P, Danesh J, Downey P, Elliott P, Green J, Landray M, et al. UK biobank: an open access resource for identifying the causes of a wide range of complex diseases of middle and old age. *PLoS Med.* 2015;12:e1001779.
2. UK Biobank Analysis Team. UK Biobank: Protocol for a large-scale prospective epidemiological resource. <https://www.ukbiobank.ac.uk/wp-content/uploads/2011/11/UK-Biobank-Protocol.pdf>. Accessed March 21, 2007.
3. Bycroft C, Freeman C, Petkova D, Band G, Elliott LT, Sharp K, Motyer A, Vukcevic D, Delaneau O, O'Connell J, et al. Genome-wide genetic data on ~500,000 UK Biobank participants. *bioRxiv.* 2017.
4. UK Biobank Analysis Team. Genotyping of 500,000 UK Biobank participants. [http://biobank.ndph.ox.ac.uk/showcase/showcase/docs/ukb\\_dna\\_processing.pdf](http://biobank.ndph.ox.ac.uk/showcase/showcase/docs/ukb_dna_processing.pdf). Accessed November 7, 2017.
5. UK Biobank Analysis Team. UKB\_WCSGAX: UK Biobank 500K Samples Processing by the Affymetrix1 Research Services Laboratory. [http://biobank.ndph.ox.ac.uk/showcase/showcase/docs/affy\\_lab\\_process2017.pdf](http://biobank.ndph.ox.ac.uk/showcase/showcase/docs/affy_lab_process2017.pdf). Accessed June, 2017.
6. Consortium TC, the CARDIoGRAMplusC4D Consortium. A comprehensive 1000 Genomes-based genome-wide association meta-analysis of coronary artery disease. *Nat Genet.* 2015;47:1121–1130.
7. Scott RA, Scott LJ, Mägi R, Marullo L, Gaulton KJ, Kaakinen M, Pervjakova N, Pers TH, Johnson AD, Eicher JD, et al. An Expanded Genome-Wide Association Study of Type 2 Diabetes in Europeans. *Diabetes.* 2017;66:2888–2902.
8. Willer CJ, Schmidt EM, Sengupta S, Peloso GM, Gustafsson S, Kanoni S, Ganna A, Chen J, Buchkovich ML, Mora S, et al. Discovery and refinement of loci associated with lipid levels. *Nat Genet.* 2013;45:1274–1283.
9. Christophersen IE, Rienstra M, Roselli C, Yin X, Geelhoed B, Barnard J, Lin H, Arking DE, Smith AV, Albert CM, et al. Erratum: Large-scale analyses of common and rare variants identify 12 new loci associated with atrial fibrillation. *Nat Genet.* 2017;49:1286.
10. Okbay A, Beauchamp JP, Fontana MA, Lee JJ, Pers TH, Rietveld CA, Turley P, Chen G-B, Emilsson V, Meddens SFW, et al. Genome-wide association study identifies 74 loci associated with educational attainment. *Nature.* 2016;533:539–542.

11. Craig CL, Marshall AL, Sjöström M, Bauman AE, Booth ML, Ainsworth BE, Pratt M, Ekelund U, Yngve A, Sallis JF, et al. International physical activity questionnaire: 12-country reliability and validity. *Med Sci Sports Exerc.* 2003;35:1381–1395.
12. Mozaffarian D. Dietary and policy priorities for cardiovascular disease, diabetes, and obesity. *Circulation.* 2016;133:187–225.
13. UK Biobank Analysis Team. UK Biobank biomarker project: companion document to accompany serum biomarker data. [http://biobank.ndph.ox.ac.uk/showcase/showcase/docs/serum\\_biochemistry.pdf](http://biobank.ndph.ox.ac.uk/showcase/showcase/docs/serum_biochemistry.pdf). Accessed November 3, 2019.
14. Vilhjálmsson BJ, Yang J, Finucane HK, Gusev A, Lindström S, Ripke S, Genovese G, Loh P-R, Bhatia G, Do R, et al. Modeling Linkage Disequilibrium Increases Accuracy of Polygenic Risk Scores. *Am J Hum Genet.* 2015;97:576–592.
15. Townsend P. Deprivation. *J Soc Policy.* 1987;16:125–146.
16. Altman DG. Confidence intervals for the number needed to treat. *BMJ.* 1998;317:1309–1312.
17. McCaw ZR, Lane JM, Saxena R, Redline S, Lin X. Operating characteristics of the rank-based inverse normal transformation for quantitative trait analysis in genome-wide association studies.

**Supplementary Table 1.** Definitions of lifestyle factors in the UK Biobank.

| <b>Lifestyle Factors</b> | <b>Ideal Status</b>                                                                                                                                                                                                                                                                                                                                                                                         | <b>Poor Status</b>                                                                              | <b>Field IDs</b>                                                                                                                                                                                                  |
|--------------------------|-------------------------------------------------------------------------------------------------------------------------------------------------------------------------------------------------------------------------------------------------------------------------------------------------------------------------------------------------------------------------------------------------------------|-------------------------------------------------------------------------------------------------|-------------------------------------------------------------------------------------------------------------------------------------------------------------------------------------------------------------------|
| Smoking                  | Never                                                                                                                                                                                                                                                                                                                                                                                                       | Current                                                                                         | 20116                                                                                                                                                                                                             |
| BMI                      | Between 18.5 kg/m <sup>2</sup> and 25 kg/m <sup>2</sup>                                                                                                                                                                                                                                                                                                                                                     | ≥ 30 kg/m <sup>2</sup>                                                                          | 21001                                                                                                                                                                                                             |
| Physical Activity        | ≥ 150 min/wk moderate activity or<br>≥ 75 min/wk vigorous activity or<br>≥ 150 min/wk mixed activity                                                                                                                                                                                                                                                                                                        | < 1 min/wk moderate activity or<br>< 1 min/wk vigorous activity or<br>< 1 min/wk mixed activity | 884, 894<br>904, 914                                                                                                                                                                                              |
| Diet                     | ≥ 5 of the following 10 characteristics:<br>1. Fruits: ≥3 servings/day<br>2. Vegetables: ≥3 servings/day<br>3. Whole grains: ≥3 servings/day<br>4. Fish: ≥2 servings/week<br>5. Dairy: ≥ 2 servings/day<br>6. Vegetable oils: ≥ 2 servings/day<br>7. Refined grains: ≤ 2 servings/day<br>8. Processed meats: ≤ 1 serving/week<br>9. Unprocessed meats ≤ 2 servings/week<br>10. Sugar-sweetened beverages: 0 | < 5 of the left 10 characteristics                                                              | 1. 1309, 1319<br>2. 1289, 1299<br>3. 1438, 1448, 1458, 1468<br>4. 1329, 1339<br>5. 1408, 1418<br>6. 1428, 2654, 1438<br>7. 1438, 1448, 1458, 1468<br>8. 1349, 3680<br>9. 1359, 1369, 1379, 1389, 3680<br>10. 6144 |

The serving sizes used per diet component is defined according to <https://jamanetwork.com/journals/jamacardiology/fullarticle/2686129>

Abbreviations: BMI, body mass index;



**Supplementary Table 2.** Diagnosis of diseases in the UK Biobank.

| <b>Disease</b>          | <b>ICD-9</b> | <b>ICD-10</b>       | <b>OPCS-4</b>                                                                             | <b>Field IDs</b>               |
|-------------------------|--------------|---------------------|-------------------------------------------------------------------------------------------|--------------------------------|
| Coronary Artery Disease | 410-412      | I21-I23, I241, I252 | K40.1-40.4, K41.1-41.4, K45.1-45.5, K49.1-49.2, K49.8-49.9, K50.2, K75.1-75.4, K75.8-75.9 | 20002(1075), 20004(1070, 1095) |
| Atrial Fibrillation     | 427.3        | I48                 | K57.1, K62.1-K62.4                                                                        | 20002(1471, 1483), 20004(1524) |
| Type 2 Diabetes         | -            | E11                 | -                                                                                         | 20002(1223)                    |

**Supplementary Table 3.** Performance of PRS by different methods

| Method                  | AUC /R2 | AUC_LL/ R2_LL | AUC_UL/ R2_UL | Parameters         | Dataset      |
|-------------------------|---------|---------------|---------------|--------------------|--------------|
| Coronary artery disease |         |               |               |                    |              |
| AnnoPred                | 0.6427  | 0.6346        | 0.6507        | Tier2, pT, p=0.003 | Training set |
| Ldpred                  | 0.6277  | 0.6195        | 0.6358        | p=0.001            | Training set |
| P+T                     | 0.6173  | 0.6091        | 0.6254        | r2=0.8, p=0.05     | Training set |
| PRScs                   | 0.6324  | 0.6244        | 0.6405        | -                  | Training set |
| AnnoPred                | 0.6425  | 0.6366        | 0.6484        | Tier2, pT, p=0.003 | Testing set  |
| Ldpred                  | 0.6302  | 0.6242        | 0.6362        | p=0.001            | Testing set  |
| P+T                     | 0.6163  | 0.6103        | 0.6224        | r2=0.8, p=0.05     | Testing set  |
| PRScs                   | 0.6336  | 0.6277        | 0.6396        | -                  | Testing set  |
| Atrial fibrillation     |         |               |               |                    |              |
| AnnoPred                | 0.6350  | 0.6257        | 0.6444        | Tier3, h2, p=0.01  | Training set |
| Ldpred                  | 0.6270  | 0.6176        | 0.6364        | p=0.001            | Training set |
| P+T                     | 0.6109  | 0.6012        | 0.6205        | r2=0.8, p=5e-06    | Training set |
| PRScs                   | 0.6197  | 0.6103        | 0.6292        | -                  | Training set |
| AnnoPred                | 0.6321  | 0.6254        | 0.6389        | Tier3, h2, p=0.01  | Testing set  |
| Ldpred                  | 0.6272  | 0.6204        | 0.6340        | p=0.001            | Testing set  |
| P+T                     | 0.6055  | 0.5986        | 0.6124        | r2=0.8, p=5e-06    | Testing set  |
| PRScs                   | 0.6189  | 0.6121        | 0.6257        | -                  | Testing set  |
| Type 2 diabetes         |         |               |               |                    |              |
| AnnoPred                | 0.6469  | 0.6389        | 0.6549        | Tier3, pT, p=0.003 | Training set |
| Ldpred                  | 0.6439  | 0.6359        | 0.6520        | p=0.003            | Training set |
| P+T                     | 0.6071  | 0.5989        | 0.6154        | r2=0.8, p=0.05     | Training set |
| PRScs                   | 0.6435  | 0.6354        | 0.6515        | -                  | Training set |
| AnnoPred                | 0.6446  | 0.6385        | 0.6507        | Tier3, pT, p=0.003 | Testing set  |
| Ldpred                  | 0.6388  | 0.6327        | 0.6449        | p=0.003            | Testing set  |
| P+T                     | 0.6020  | 0.5957        | 0.6084        | r2=0.8, p=0.05     | Testing set  |
| PRScs                   | 0.6394  | 0.6333        | 0.6455        | -                  | Testing set  |
| Total cholesterol       |         |               |               |                    |              |
| AnnoPred                | 0.07197 | 0.06873       | 0.07528       | Tier1, pT, p=0.01  | Training set |
| Ldpred                  | 0.06327 | 0.06020       | 0.06641       | p=0.03             | Training set |
| P+T                     | 0.05121 | 0.04841       | 0.05407       | r2=0.2, p=5e-08    | Training set |
| PRScs                   | 0.06982 | 0.06661       | 0.07308       | -                  | Training set |
| AnnoPred                | 0.07513 | 0.07277       | 0.07752       | Tier1, pT, p=0.01  | Testing set  |
| Ldpred                  | 0.06605 | 0.06382       | 0.06832       | p=0.03             | Testing set  |
| P+T                     | 0.05089 | 0.04890       | 0.05292       | r2=0.2, p=5e-08    | Testing set  |
| PRScs                   | 0.07232 | 0.06999       | 0.07468       | -                  | Testing set  |
| Triglyceride            |         |               |               |                    |              |
| AnnoPred                | 0.07270 | 0.06943       | 0.07602       | Tier3, h2, p=0.01  | Training set |
| Ldpred                  | 0.06951 | 0.06631       | 0.07277       | p=0.001            | Training set |
| P+T                     | 0.04228 | 0.03972       | 0.04491       | r2=0.8, p=5e-06    | Training set |
| PRScs                   | 0.06945 | 0.06626       | 0.07272       | -                  | Training set |

|          |         |         |         |                   |              |
|----------|---------|---------|---------|-------------------|--------------|
| AnnoPred | 0.07437 | 0.07202 | 0.07676 | Tier3, h2, p=0.01 | Testing set  |
| Ldpred   | 0.07056 | 0.06826 | 0.07289 | p=0.001           | Testing set  |
| P+T      | 0.04328 | 0.04143 | 0.04517 | r2=0.8, p=5e-06   | Testing set  |
| PRScs    | 0.07028 | 0.06798 | 0.07261 | -                 | Testing set  |
| LDL-C    |         |         |         |                   |              |
| AnnoPred | 0.06904 | 0.06585 | 0.07230 | Tier0, pT, p=0.01 | Training set |
| Ldpred   | 0.06885 | 0.06566 | 0.07210 | p=0.01            | Training set |
| P+T      | 0.01919 | 0.01744 | 0.02102 | r2=0.8, p=5e-04   | Training set |
| PRScs    | 0.06780 | 0.06463 | 0.07103 | -                 | Training set |
| AnnoPred | 0.07054 | 0.06824 | 0.07287 | Tier0, pT, p=0.01 | Testing set  |
| Ldpred   | 0.07069 | 0.06838 | 0.07302 | p=0.01            | Testing set  |
| P+T      | 0.02020 | 0.01891 | 0.02153 | r2=0.8, p=5e-04   | Testing set  |
| PRScs    | 0.07007 | 0.06777 | 0.07240 | -                 | Testing set  |

Abbreviations: PRS, polygenic risk score; pT, AnnoPred based on the prior assuming different proportions of causal SNPs but the same effect size across annotation categories; h2, AnnoPred based on the prior assuming the same proportion of causal SNPs but different effect sizes across annotation categories; Tier0, AnnoPred based on 53 Baseline\_Annotation + 1 GenoCanyon\_Annotation; Tier1, AnnoPred based on 53 Baseline\_Annotation + 1 GenoCanyon\_Annotation + 7 GenoSkyline\_Annotation; Tier2, AnnoPred based on 53 Baseline\_Annotation + 1 GenoCanyon\_Annotation + 7 GenoSkyline-Plus\_tissue\_Annotation; Tier3, AnnoPred based on 53 Baseline\_Annotation + 1 GenoCanyon\_Annotation + 66 GenoSkyline-Plus\_cell\_Annotation;

**Supplementary Table 4.** Sample size of subgroups stratified by PRS and combined lifestyle

| <b>PRS Group</b> | <b>Lifestyle: Ideal</b> | <b>Lifestyle: Intermediate</b> | <b>Lifestyle: Poor</b> |
|------------------|-------------------------|--------------------------------|------------------------|
| CAD: < 5% PRS    | 1510                    | 6631                           | 671                    |
| CAD: 5-10% PRS   | 1523                    | 6569                           | 721                    |
| CAD: 10-20% PRS  | 2975                    | 13280                          | 1368                   |
| CAD: 20-40% PRS  | 5786                    | 26662                          | 2799                   |
| CAD: 40-60% PRS  | 5647                    | 26745                          | 2856                   |
| CAD: 60-80% PRS  | 5674                    | 26543                          | 3030                   |
| CAD: 80-90% PRS  | 2704                    | 13279                          | 1641                   |
| CAD: 90-95% PRS  | 1390                    | 6640                           | 782                    |
| CAD: 95-99% PRS  | 1055                    | 5303                           | 691                    |
| CAD: > 99% PRS   | 263                     | 1336                           | 164                    |
| AF: < 5% PRS     | 1477                    | 6727                           | 730                    |
| AF: 5-10% PRS    | 1446                    | 6747                           | 739                    |
| AF: 10-20% PRS   | 2983                    | 13414                          | 1468                   |
| AF: 20-40% PRS   | 5767                    | 26918                          | 3046                   |
| AF: 40-60% PRS   | 5688                    | 26972                          | 3071                   |
| AF: 60-80% PRS   | 5682                    | 27014                          | 3034                   |
| AF: 80-90% PRS   | 2798                    | 13499                          | 1567                   |
| AF: 90-95% PRS   | 1418                    | 6757                           | 756                    |
| AF: 95-99% PRS   | 1091                    | 5454                           | 601                    |
| AF: > 99% PRS    | 286                     | 1342                           | 159                    |
| T2D: < 5% PRS    | 1620                    | 6688                           | 599                    |
| T2D: 5-10% PRS   | 1531                    | 6723                           | 653                    |
| T2D: 10-20% PRS  | 3095                    | 13371                          | 1348                   |
| T2D: 20-40% PRS  | 6012                    | 26772                          | 2843                   |
| T2D: 40-60% PRS  | 5652                    | 26974                          | 3003                   |
| T2D: 60-80% PRS  | 5568                    | 26954                          | 3105                   |
| T2D: 80-90% PRS  | 2671                    | 13571                          | 1571                   |
| T2D: 90-95% PRS  | 1320                    | 6779                           | 808                    |
| T2D: 95-99% PRS  | 1027                    | 5449                           | 649                    |
| T2D: > 99% PRS   | 256                     | 1345                           | 181                    |
| TC: < 5% PRS     | 1289                    | 5680                           | 657                    |
| TC: 5-10% PRS    | 1295                    | 5699                           | 632                    |
| TC: 10-20% PRS   | 2609                    | 11494                          | 1148                   |
| TC: 20-40% PRS   | 5226                    | 22877                          | 2399                   |
| TC: 40-60% PRS   | 5259                    | 22988                          | 2255                   |
| TC: 60-80% PRS   | 5389                    | 22869                          | 2244                   |
| TC: 80-90% PRS   | 2668                    | 11457                          | 1126                   |
| TC: 90-95% PRS   | 1386                    | 5733                           | 506                    |
| TC: 95-99% PRS   | 1169                    | 4482                           | 450                    |
| TC: > 99% PRS    | 255                     | 1164                           | 106                    |
| TG: < 5% PRS     | 1398                    | 5650                           | 578                    |
| TG: 5-10% PRS    | 1318                    | 5736                           | 572                    |

|                   |      |       |      |
|-------------------|------|-------|------|
| TG: 10-20% PRS    | 2614 | 11468 | 1169 |
| TG: 20-40% PRS    | 5294 | 22910 | 2298 |
| TG: 40-60% PRS    | 5303 | 22909 | 2291 |
| TG: 60-80% PRS    | 5270 | 22970 | 2261 |
| TG: 80-90% PRS    | 2670 | 11399 | 1182 |
| TG: 90-95% PRS    | 1313 | 5705  | 607  |
| TG: 95-99% PRS    | 1086 | 4567  | 447  |
| TG: > 99% PRS     | 279  | 1129  | 118  |
| LDL-C: < 5% PRS   | 1276 | 5712  | 638  |
| LDL-C: 5-10% PRS  | 1328 | 5703  | 595  |
| LDL-C: 10-20% PRS | 2544 | 11461 | 1247 |
| LDL-C: 20-40% PRS | 5228 | 22951 | 2322 |
| LDL-C: 40-60% PRS | 5344 | 22867 | 2291 |
| LDL-C: 60-80% PRS | 5340 | 22902 | 2260 |
| LDL-C: 80-90% PRS | 2710 | 11465 | 1076 |
| LDL-C: 90-95% PRS | 1358 | 5698  | 569  |
| LDL-C: 95-99% PRS | 1150 | 4522  | 428  |
| LDL-C: > 99% PRS  | 267  | 1162  | 97   |

Abbreviations: PRS, polygenic risk score; CAD, coronary artery disease; AF, atrial fibrillation; T2D, type 2 diabetes; TC, total cholesterol; TG, triglyceride; LDL-C, low density lipoprotein cholesterol;

**Supplementary Table 5.** Association of PRS and combined lifestyle factors with coronary artery disease, atrial fibrillation, and type 2 diabetes.

| Lifestyle combination   | PRS quantile | HR   | HR_CL | HR_UL | Wald.test | P.value    |
|-------------------------|--------------|------|-------|-------|-----------|------------|
| Coronary artery disease |              |      |       |       |           |            |
| Poor                    | <5%          | 0.51 | 0.244 | 1.09  | -1.7      | 0.081      |
| Poor                    | 5-10%        | 1.07 | 0.651 | 1.77  | 0.27      | 0.78       |
| Poor                    | 10-20%       | 1.01 | 0.687 | 1.5   | 0.067     | 0.95       |
| Poor                    | 20-40%       | 1.32 | 1.03  | 1.69  | 2.2       | 0.026      |
| Poor                    | 40-60%       | 1.44 | 1.14  | 1.82  | 3         | 0.0025     |
| Poor                    | 60-80%       | 1.87 | 1.52  | 2.3   | 5.9       | 4.5E-09    |
| Poor                    | 80-90%       | 2.74 | 2.17  | 3.46  | 8.5       | 2.2E-17    |
| Poor                    | 90-95%       | 2.28 | 1.57  | 3.31  | 4.3       | 0.000014   |
| Poor                    | 95-99%       | 3.26 | 2.33  | 4.57  | 6.9       | 7.1E-12    |
| Poor                    | > 99%        | 5.23 | 3.01  | 9.09  | 5.9       | 4.6E-09    |
| Intermediate            | <5%          | 0.37 | 0.275 | 0.498 | -6.6      | 4.6E-11    |
| Intermediate            | 5-10%        | 0.37 | 0.274 | 0.494 | -6.6      | 3.4E-11    |
| Intermediate            | 10-20%       | 0.58 | 0.486 | 0.697 | -5.9      | 4.1E-09    |
| Intermediate            | 20-40%       | 0.74 | 0.65  | 0.845 | -4.5      | 0.0000081  |
| Intermediate            | 40-60%       | 1    | 1     | 1     | NA        | NA         |
| Intermediate            | 60-80%       | 1.25 | 1.11  | 1.4   | 3.7       | 0.00022    |
| Intermediate            | 80-90%       | 1.54 | 1.35  | 1.75  | 6.4       | 1.7E-10    |
| Intermediate            | 90-95%       | 1.98 | 1.7   | 2.31  | 8.8       | 1.5E-18    |
| Intermediate            | 95-99%       | 2.27 | 1.93  | 2.66  | 10        | 1.5E-23    |
| Intermediate            | > 99%        | 4.23 | 3.39  | 5.28  | 13        | 3.5E-37    |
| Ideal                   | <5%          | 0.32 | 0.151 | 0.672 | -3        | 0.0027     |
| Ideal                   | 5-10%        | 0.54 | 0.304 | 0.958 | -2.1      | 0.035      |
| Ideal                   | 10-20%       | 0.41 | 0.251 | 0.661 | -3.6      | 0.00028    |
| Ideal                   | 20-40%       | 0.42 | 0.292 | 0.593 | -4.9      | 0.0000012  |
| Ideal                   | 40-60%       | 0.7  | 0.526 | 0.92  | -2.5      | 0.011      |
| Ideal                   | 60-80%       | 0.73 | 0.552 | 0.954 | -2.3      | 0.022      |
| Ideal                   | 80-90%       | 0.86 | 0.602 | 1.23  | -0.82     | 0.41       |
| Ideal                   | 90-95%       | 1.59 | 1.09  | 2.32  | 2.4       | 0.015      |
| Ideal                   | 95-99%       | 0.96 | 0.565 | 1.64  | -0.14     | 0.89       |
| Ideal                   | > 99%        | 3.19 | 1.64  | 6.19  | 3.4       | 0.00061    |
| Atrial fibrillation     |              |      |       |       |           |            |
| Poor                    | <5%          | 0.54 | 0.266 | 1.08  | -1.8      | 0.08       |
| Poor                    | 5-10%        | 0.59 | 0.304 | 1.14  | -1.6      | 0.11       |
| Poor                    | 10-20%       | 1.04 | 0.725 | 1.5   | 0.23      | 0.82       |
| Poor                    | 20-40%       | 1.15 | 0.901 | 1.48  | 1.1       | 0.26       |
| Poor                    | 40-60%       | 1.66 | 1.34  | 2.06  | 4.6       | 0.0000045  |
| Poor                    | 60-80%       | 2.15 | 1.77  | 2.61  | 7.7       | 1.2E-14    |
| Poor                    | 80-90%       | 2.47 | 1.93  | 3.15  | 7.2       | 5.8E-13    |
| Poor                    | 90-95%       | 3.29 | 2.43  | 4.46  | 7.7       | 1.6E-14    |
| Poor                    | 95-99%       | 2.79 | 1.95  | 3.99  | 5.6       | 0.00000002 |

|                 |        |      |        |       |      |           |
|-----------------|--------|------|--------|-------|------|-----------|
| Poor            | > 99%  | 5.43 | 3.34   | 8.82  | 6.8  | 7.8E-12   |
| Intermediate    | <5%    | 0.56 | 0.445  | 0.709 | -4.8 | 0.0000012 |
| Intermediate    | 5-10%  | 0.48 | 0.37   | 0.613 | -5.8 | 7.7E-09   |
| Intermediate    | 10-20% | 0.6  | 0.504  | 0.71  | -5.9 | 3.9E-09   |
| Intermediate    | 20-40% | 0.8  | 0.704  | 0.901 | -3.6 | 0.00029   |
| Intermediate    | 40-60% | 1    | 1      | 1     | NA   | NA        |
| Intermediate    | 60-80% | 1.23 | 1.1    | 1.37  | 3.6  | 0.00031   |
| Intermediate    | 80-90% | 1.57 | 1.39   | 1.78  | 7.1  | 1.1E-12   |
| Intermediate    | 90-95% | 1.78 | 1.53   | 2.07  | 7.5  | 4.8E-14   |
| Intermediate    | 95-99% | 2.38 | 2.06   | 2.76  | 12   | 4E-31     |
| Intermediate    | > 99%  | 3.69 | 2.96   | 4.6   | 12   | 4.5E-31   |
| Ideal           | <5%    | 0.54 | 0.312  | 0.938 | -2.2 | 0.029     |
| Ideal           | 5-10%  | 0.25 | 0.111  | 0.556 | -3.4 | 0.00071   |
| Ideal           | 10-20% | 0.27 | 0.16   | 0.463 | -4.8 | 0.0000016 |
| Ideal           | 20-40% | 0.59 | 0.447  | 0.775 | -3.8 | 0.00015   |
| Ideal           | 40-60% | 0.88 | 0.701  | 1.11  | -1.1 | 0.29      |
| Ideal           | 60-80% | 1.08 | 0.875  | 1.34  | 0.74 | 0.46      |
| Ideal           | 80-90% | 1.37 | 1.06   | 1.78  | 2.4  | 0.018     |
| Ideal           | 90-95% | 1.83 | 1.33   | 2.51  | 3.8  | 0.00017   |
| Ideal           | 95-99% | 2.73 | 2.04   | 3.66  | 6.7  | 2E-11     |
| Ideal           | > 99%  | 2.15 | 1.15   | 4.02  | 2.4  | 0.017     |
| Type 2 diabetes |        |      |        |       |      |           |
| Poor            | <5%    | 1.26 | 0.806  | 1.97  | 1    | 0.31      |
| Poor            | 5-10%  | 1.12 | 0.709  | 1.77  | 0.49 | 0.62      |
| Poor            | 10-20% | 1.88 | 1.45   | 2.44  | 4.7  | 0.0000024 |
| Poor            | 20-40% | 2    | 1.66   | 2.41  | 7.3  | 2.5E-13   |
| Poor            | 40-60% | 2.26 | 1.9    | 2.68  | 9.2  | 3.4E-20   |
| Poor            | 60-80% | 3.36 | 2.89   | 3.91  | 16   | 4.9E-56   |
| Poor            | 80-90% | 3.57 | 2.95   | 4.32  | 13   | 2.1E-39   |
| Poor            | 90-95% | 5.01 | 4.01   | 6.25  | 14   | 3.2E-46   |
| Poor            | 95-99% | 4.66 | 3.62   | 6.01  | 12   | 1.4E-32   |
| Poor            | > 99%  | 6.76 | 4.55   | 10.1  | 9.4  | 3.9E-21   |
| Intermediate    | <5%    | 0.31 | 0.23   | 0.412 | -7.9 | 2E-15     |
| Intermediate    | 5-10%  | 0.46 | 0.36   | 0.585 | -6.3 | 3.2E-10   |
| Intermediate    | 10-20% | 0.53 | 0.448  | 0.63  | -7.3 | 3.8E-13   |
| Intermediate    | 20-40% | 0.79 | 0.704  | 0.891 | -3.9 | 0.00011   |
| Intermediate    | 40-60% | 1    | 1      | 1     | NA   | NA        |
| Intermediate    | 60-80% | 1.24 | 1.12   | 1.38  | 4.1  | 0.000048  |
| Intermediate    | 80-90% | 1.76 | 1.57   | 1.98  | 9.6  | 7.5E-22   |
| Intermediate    | 90-95% | 2.2  | 1.93   | 2.51  | 12   | 1.9E-31   |
| Intermediate    | 95-99% | 2.55 | 2.23   | 2.93  | 14   | 1E-41     |
| Intermediate    | > 99%  | 3.67 | 2.99   | 4.52  | 12   | 8.9E-35   |
| Ideal           | <5%    | 0.13 | 0.0487 | 0.348 | -4.1 | 0.000049  |
| Ideal           | 5-10%  | 0.22 | 0.098  | 0.49  | -3.7 | 0.00022   |
| Ideal           | 10-20% | 0.14 | 0.0697 | 0.282 | -5.5 | 3.5E-8    |

|       |        |      |       |       |        |           |
|-------|--------|------|-------|-------|--------|-----------|
| Ideal | 20-40% | 0.29 | 0.2   | 0.409 | -6.9   | 6.3E-12   |
| Ideal | 40-60% | 0.33 | 0.237 | 0.471 | -6.3   | 3.5E-10   |
| Ideal | 60-80% | 0.47 | 0.346 | 0.626 | -5.1   | 0.0000004 |
| Ideal | 80-90% | 0.69 | 0.482 | 0.976 | -2.1   | 0.036     |
| Ideal | 90-95% | 0.49 | 0.277 | 0.87  | -2.4   | 0.015     |
| Ideal | 95-99% | 1.12 | 0.724 | 1.73  | 0.51   | 0.61      |
| Ideal | > 99%  | 0.98 | 0.406 | 2.36  | -0.049 | 0.96      |

Abbreviations: PRS, polygenic risk score;



**Supplementary Table 6.** Minimal detectable interaction effect between AnnoPred PRS and lifestyle with 80% power for coronary artery diseases, atrial fibrillation and type 2 diabetes.

| <b>Traits (Effect size type)</b> | <b>PRS * Intermediate lifestyle</b> | <b>PRS * Poor lifestyle</b> |
|----------------------------------|-------------------------------------|-----------------------------|
| Coronary artery disease (HR)     | 1.12                                | 1.17                        |
| Atrial fibrillation (HR)         | 1.11                                | 1.15                        |
| Type 2 diabetes (HR)             | 1.11                                | 1.14                        |

Ideal lifestyle category was set as reference, alpha was 0.025 (0.05/2) for each disease/trait.

**Supplementary Table 7.** Interactions of PRS and combined lifestyle factors for coronary artery disease, atrial fibrillation, and type 2 diabetes in terms of relative risks.

| <b>PRS * Lifestyle</b>                  | <b>Coef</b> | <b>Exp(coef)</b> | <b>Se(coef)</b> | <b>Z</b> | <b>Pr</b> |
|-----------------------------------------|-------------|------------------|-----------------|----------|-----------|
| <b>Coronary artery disease</b>          |             |                  |                 |          |           |
| Continuous PRS * Intermediate lifestyle | 0.0679      | 1.0702           | 0.0652          | 1.0409   | 0.2979    |
| Continuous PRS * Poor lifestyle         | -0.0462     | 0.9549           | 0.0777          | -0.5943  | 0.5523    |
| 5%-10% PRS * Intermediate lifestyle     | -0.5395     | 0.5830           | 0.5176          | -1.0424  | 0.2972    |
| 5%-10% PRS * Poor lifestyle             | 0.1918      | 1.2114           | 0.6569          | 0.2919   | 0.7703    |
| 10-20% PRS * Intermediate lifestyle     | 0.2049      | 1.2275           | 0.4786          | 0.4282   | 0.6685    |
| 10-20% PRS * Poor lifestyle             | 0.4199      | 1.5219           | 0.6177          | 0.6798   | 0.4966    |
| 20-40% PRS * Intermediate lifestyle     | 0.4272      | 1.5330           | 0.4434          | 0.9636   | 0.3353    |
| 20-40% PRS * Poor lifestyle             | 0.6743      | 1.9627           | 0.5741          | 1.1747   | 0.2401    |
| 40-60% PRS * Intermediate lifestyle     | 0.2146      | 1.2394           | 0.4287          | 0.5007   | 0.6166    |
| 40-60% PRS * Poor lifestyle             | 0.2470      | 1.2802           | 0.5622          | 0.4393   | 0.6604    |
| 60-80% PRS * Intermediate lifestyle     | 0.3647      | 1.4401           | 0.4272          | 0.8537   | 0.3933    |
| 60-80% PRS * Poor lifestyle             | 0.4453      | 1.5609           | 0.5586          | 0.7970   | 0.4254    |
| 80-90% PRS * Intermediate lifestyle     | 0.4216      | 1.5244           | 0.4445          | 0.9486   | 0.3428    |
| 80-90% PRS * Poor lifestyle             | 0.6603      | 1.9353           | 0.5734          | 1.1516   | 0.2495    |
| 90-95% PRS * Intermediate lifestyle     | 0.0528      | 1.0542           | 0.4498          | 0.1174   | 0.9065    |
| 90-95% PRS * Poor lifestyle             | -0.1536     | 0.8576           | 0.5946          | -0.2584  | 0.7961    |
| 95-99% PRS * Intermediate lifestyle     | 0.6874      | 1.9886           | 0.4898          | 1.4036   | 0.1604    |
| 95-99% PRS * Poor lifestyle             | 0.7032      | 2.0202           | 0.6199          | 1.1344   | 0.2566    |
| >99% PRS * Intermediate lifestyle       | 0.1510      | 1.1631           | 0.5344          | 0.2826   | 0.7775    |
| >99% PRS * Poor lifestyle               | 0.0183      | 1.0185           | 0.6884          | 0.0266   | 0.9788    |
| <b>Atrial fibrillation</b>              |             |                  |                 |          |           |
| Continuous PRS * Intermediate lifestyle | -0.0955     | 0.9089           | 0.0490          | -1.9495  | 0.0512    |
| Continuous PRS * Poor lifestyle         | -0.0905     | 0.9135           | 0.0627          | -1.4420  | 0.1493    |
| 5%-10% PRS * Intermediate lifestyle     | 0.6190      | 1.8571           | 0.5202          | 1.1898   | 0.2341    |
| 5%-10% PRS * Poor lifestyle             | 0.8826      | 2.4172           | 0.6926          | 1.2743   | 0.2026    |
| 10-20% PRS * Intermediate lifestyle     | 0.7475      | 2.1118           | 0.4081          | 1.8317   | 0.0670    |
| 10-20% PRS * Poor lifestyle             | 1.3567      | 3.8834           | 0.5528          | 2.4541   | 0.0141    |
| 20-40% PRS * Intermediate lifestyle     | 0.2708      | 1.3110           | 0.3302          | 0.8201   | 0.4122    |
| 20-40% PRS * Poor lifestyle             | 0.7076      | 2.0291           | 0.4831          | 1.4647   | 0.1430    |
| 40-60% PRS * Intermediate lifestyle     | 0.0743      | 1.0771           | 0.3206          | 0.2317   | 0.8167    |
| 40-60% PRS * Poor lifestyle             | 0.6236      | 1.8657           | 0.4730          | 1.3186   | 0.1873    |
| 60-80% PRS * Intermediate lifestyle     | 0.0720      | 1.0746           | 0.3171          | 0.2270   | 0.8204    |
| 60-80% PRS * Poor lifestyle             | 0.6914      | 1.9966           | 0.4684          | 1.4760   | 0.1399    |
| 80-90% PRS * Intermediate lifestyle     | 0.0943      | 1.0989           | 0.3278          | 0.2877   | 0.7736    |
| 80-90% PRS * Poor lifestyle             | 0.6001      | 1.8223           | 0.4810          | 1.2476   | 0.2122    |
| 90-95% PRS * Intermediate lifestyle     | -0.0680     | 0.9343           | 0.3423          | -0.1986  | 0.8426    |
| 90-95% PRS * Poor lifestyle             | 0.5771      | 1.7809           | 0.4975          | 1.1600   | 0.2460    |
| 95-99% PRS * Intermediate lifestyle     | -0.1728     | 0.8413           | 0.3369          | -0.5128  | 0.6081    |
| 95-99% PRS * Poor lifestyle             | 0.0376      | 1.0383           | 0.5036          | 0.0746   | 0.9406    |
| >99% PRS * Intermediate lifestyle       | 0.5054      | 1.6577           | 0.4474          | 1.1297   | 0.2586    |

|                                         |         |        |        |         |        |
|-----------------------------------------|---------|--------|--------|---------|--------|
| >99% PRS * Poor lifestyle               | 0.9819  | 2.6695 | 0.6007 | 1.6346  | 0.1021 |
| Type 2 diabetes                         |         |        |        |         |        |
| Continuous PRS * Intermediate lifestyle | 0.0182  | 1.0184 | 0.0710 | 0.2567  | 0.7974 |
| Continuous PRS * Poor lifestyle         | -0.1139 | 0.8923 | 0.0761 | -1.4960 | 0.1347 |
| 5%-10% PRS * Intermediate lifestyle     | -0.1131 | 0.8930 | 0.6714 | -0.1685 | 0.8662 |
| 5%-10% PRS * Poor lifestyle             | -0.6268 | 0.5343 | 0.7206 | -0.8697 | 0.3844 |
| 10-20% PRS * Intermediate lifestyle     | 0.4705  | 1.6009 | 0.6336 | 0.7427  | 0.4577 |
| 10-20% PRS * Poor lifestyle             | 0.3062  | 1.3583 | 0.6640 | 0.4612  | 0.6446 |
| 20-40% PRS * Intermediate lifestyle     | 0.1445  | 1.1555 | 0.5511 | 0.2622  | 0.7931 |
| 20-40% PRS * Poor lifestyle             | -0.3419 | 0.7104 | 0.5816 | -0.5878 | 0.5566 |
| 40-60% PRS * Intermediate lifestyle     | 0.2346  | 1.2644 | 0.5483 | 0.4278  | 0.6688 |
| 40-60% PRS * Poor lifestyle             | -0.3690 | 0.6914 | 0.5784 | -0.6379 | 0.5235 |
| 60-80% PRS * Intermediate lifestyle     | 0.1158  | 1.1228 | 0.5409 | 0.2141  | 0.8305 |
| 60-80% PRS * Poor lifestyle             | -0.3237 | 0.7235 | 0.5700 | -0.5679 | 0.5701 |
| 80-90% PRS * Intermediate lifestyle     | 0.0710  | 1.0735 | 0.5501 | 0.1290  | 0.8974 |
| 80-90% PRS * Poor lifestyle             | -0.6363 | 0.5293 | 0.5812 | -1.0948 | 0.2736 |
| 90-95% PRS * Intermediate lifestyle     | 0.6417  | 1.8996 | 0.5973 | 1.0743  | 0.2827 |
| 90-95% PRS * Poor lifestyle             | 0.0311  | 1.0316 | 0.6278 | 0.0495  | 0.9605 |
| 95-99% PRS * Intermediate lifestyle     | -0.0443 | 0.9567 | 0.5668 | -0.0782 | 0.9377 |
| 95-99% PRS * Poor lifestyle             | -0.8557 | 0.4250 | 0.6020 | -1.4216 | 0.1551 |
| >99% PRS * Intermediate lifestyle       | 0.4430  | 1.5573 | 0.6928 | 0.6394  | 0.5226 |
| >99% PRS * Poor lifestyle               | -0.3884 | 0.6781 | 0.7339 | -0.5293 | 0.5966 |

Abbreviations: PRS, polygenic risk score;

**Supplementary Table 8.** Absolute risk reduction from healthy lifestyle for coronary artery disease, atrial fibrillation, and type 2 diabetes.

| <b>PRS quantile</b>            | <b>ARR (%)</b> | <b>SE (%)</b> |
|--------------------------------|----------------|---------------|
| <b>Coronary artery disease</b> |                |               |
| < 10%                          | 1.03           | 0.31          |
| 10-20%                         | 1.40           | 0.35          |
| 20-40%                         | 2.07           | 0.29          |
| 40-60%                         | 1.90           | 0.28          |
| 60-80%                         | 2.61           | 0.31          |
| 80-90%                         | 4.00           | 0.51          |
| 90-99%                         | 2.79           | 0.47          |
| > 99%                          | 4.50           | 1.79          |
| <b>Atrial fibrillation</b>     |                |               |
| < 10%                          | 0.51           | 0.24          |
| 10-20%                         | 1.64           | 0.35          |
| 20-40%                         | 1.38           | 0.24          |
| 40-60%                         | 1.76           | 0.28          |
| 60-80%                         | 2.49           | 0.32          |
| 80-90%                         | 2.47           | 0.46          |
| 90-99%                         | 2.12           | 0.51          |
| > 99%                          | 7.20           | 2.20          |
| <b>Type 2 diabetes</b>         |                |               |
| < 10%                          | 2.80           | 0.48          |
| 10-20%                         | 4.42           | 0.57          |
| 20-40%                         | 4.46           | 0.40          |
| 40-60%                         | 4.98           | 0.41          |
| 60-80%                         | 7.16           | 0.47          |
| 80-90%                         | 7.29           | 0.67          |
| 90-99%                         | 9.64           | 0.78          |
| > 99%                          | 12.41          | 2.46          |

**Supplementary Table 9.** Association of PRS and combined lifestyle factors with lipid levels.

| <b>Lifestyle combination</b> | <b>PRS quantile</b> | <b>Mean</b> | <b>SD</b> |
|------------------------------|---------------------|-------------|-----------|
| <b>Total cholesterol</b>     |                     |             |           |
| Poor                         | <5%                 | 5.111       | 0.966     |
| Poor                         | 5-10%               | 5.351       | 0.956     |
| Poor                         | 10-20%              | 5.518       | 0.953     |
| Poor                         | 20-40%              | 5.761       | 0.972     |
| Poor                         | 40-60%              | 5.987       | 0.982     |
| Poor                         | 60-80%              | 6.217       | 1.070     |
| Poor                         | 80-90%              | 6.380       | 1.048     |
| Poor                         | 90-95%              | 6.496       | 1.154     |
| Poor                         | 95-99%              | 6.674       | 1.081     |
| Poor                         | > 99%               | 6.975       | 1.107     |
| Intermediate                 | <5%                 | 5.099       | 0.905     |
| Intermediate                 | 5-10%               | 5.352       | 0.902     |
| Intermediate                 | 10-20%              | 5.535       | 0.928     |
| Intermediate                 | 20-40%              | 5.727       | 0.957     |
| Intermediate                 | 40-60%              | 5.959       | 0.989     |
| Intermediate                 | 60-80%              | 6.155       | 1.017     |
| Intermediate                 | 80-90%              | 6.335       | 1.040     |
| Intermediate                 | 90-95%              | 6.516       | 1.077     |
| Intermediate                 | 95-99%              | 6.682       | 1.102     |
| Intermediate                 | > 99%               | 6.946       | 1.177     |
| Ideal                        | <5%                 | 5.005       | 0.845     |
| Ideal                        | 5-10%               | 5.293       | 0.901     |
| Ideal                        | 10-20%              | 5.418       | 0.924     |
| Ideal                        | 20-40%              | 5.604       | 0.945     |
| Ideal                        | 40-60%              | 5.780       | 0.973     |
| Ideal                        | 60-80%              | 6.002       | 0.999     |
| Ideal                        | 80-90%              | 6.187       | 1.027     |
| Ideal                        | 90-95%              | 6.404       | 1.075     |
| Ideal                        | 95-99%              | 6.521       | 1.059     |
| Ideal                        | > 99%               | 6.697       | 1.032     |
| <b>Triglyceride</b>          |                     |             |           |
| Poor                         | <5%                 | 1.695       | 0.871     |
| Poor                         | 5-10%               | 1.785       | 0.971     |
| Poor                         | 10-20%              | 1.811       | 0.908     |
| Poor                         | 20-40%              | 1.960       | 1.017     |
| Poor                         | 40-60%              | 2.122       | 1.177     |
| Poor                         | 60-80%              | 2.263       | 1.226     |
| Poor                         | 80-90%              | 2.467       | 1.328     |
| Poor                         | 90-95%              | 2.641       | 1.457     |
| Poor                         | 95-99%              | 2.681       | 1.434     |
| Poor                         | > 99%               | 2.917       | 1.246     |

|              |        |       |       |
|--------------|--------|-------|-------|
| Intermediate | <5%    | 1.345 | 0.684 |
| Intermediate | 5-10%  | 1.441 | 0.771 |
| Intermediate | 10-20% | 1.505 | 0.801 |
| Intermediate | 20-40% | 1.609 | 0.864 |
| Intermediate | 40-60% | 1.711 | 0.929 |
| Intermediate | 60-80% | 1.837 | 1.023 |
| Intermediate | 80-90% | 1.982 | 1.120 |
| Intermediate | 90-95% | 2.105 | 1.187 |
| Intermediate | 95-99% | 2.250 | 1.316 |
| Intermediate | > 99%  | 2.511 | 1.539 |
| Ideal        | <5%    | 1.094 | 0.544 |
| Ideal        | 5-10%  | 1.151 | 0.541 |
| Ideal        | 10-20% | 1.145 | 0.545 |
| Ideal        | 20-40% | 1.241 | 0.621 |
| Ideal        | 40-60% | 1.305 | 0.675 |
| Ideal        | 60-80% | 1.394 | 0.709 |
| Ideal        | 80-90% | 1.516 | 0.811 |
| Ideal        | 90-95% | 1.584 | 0.865 |
| Ideal        | 95-99% | 1.668 | 0.947 |
| Ideal        | > 99%  | 1.834 | 1.132 |
| LDL-C        |        |       |       |
| Poor         | <5%    | 3.167 | 0.716 |
| Poor         | 5-10%  | 3.411 | 0.724 |
| Poor         | 10-20% | 3.508 | 0.750 |
| Poor         | 20-40% | 3.689 | 0.747 |
| Poor         | 40-60% | 3.865 | 0.767 |
| Poor         | 60-80% | 3.999 | 0.802 |
| Poor         | 80-90% | 4.146 | 0.820 |
| Poor         | 90-95% | 4.230 | 0.829 |
| Poor         | 95-99% | 4.326 | 0.852 |
| Poor         | > 99%  | 4.415 | 0.767 |
| Intermediate | <5%    | 3.118 | 0.702 |
| Intermediate | 5-10%  | 3.314 | 0.683 |
| Intermediate | 10-20% | 3.443 | 0.713 |
| Intermediate | 20-40% | 3.598 | 0.744 |
| Intermediate | 40-60% | 3.756 | 0.753 |
| Intermediate | 60-80% | 3.916 | 0.779 |
| Intermediate | 80-90% | 4.058 | 0.800 |
| Intermediate | 90-95% | 4.154 | 0.810 |
| Intermediate | 95-99% | 4.302 | 0.846 |
| Intermediate | > 99%  | 4.492 | 0.869 |
| Ideal        | <5%    | 2.979 | 0.659 |
| Ideal        | 5-10%  | 3.173 | 0.686 |
| Ideal        | 10-20% | 3.269 | 0.716 |
| Ideal        | 20-40% | 3.416 | 0.720 |

|       |        |       |       |
|-------|--------|-------|-------|
| Ideal | 40-60% | 3.569 | 0.745 |
| Ideal | 60-80% | 3.685 | 0.766 |
| Ideal | 80-90% | 3.850 | 0.801 |
| Ideal | 90-95% | 3.983 | 0.783 |
| Ideal | 95-99% | 4.121 | 0.829 |
| Ideal | > 99%  | 4.200 | 0.797 |

**Supplementary Table 10.** Minimal detectable interaction effect between AnnoPred PRS and lifestyle with 80% power for lipid levels.

| <b>Traits (Effect size type)</b> | <b>PRS * Intermediate lifestyle</b> | <b>PRS * Poor lifestyle</b> |
|----------------------------------|-------------------------------------|-----------------------------|
| Total cholesterol (Beta)         | 0.013                               | 0.021                       |
| Triglyceride (Beta)              | 0.014                               | 0.019                       |
| LDL-cholesterol (Beta)           | 0.013                               | 0.020                       |

Ideal lifestyle category was set as reference, alpha was 0.025 (0.05/2) for each disease/trait.



**Supplementary Table 11.** Interactions of PRS and combined lifestyle factors for lipid levels

| PRS * Lifestyle                         | Estimate | Std. Error | t value | Pr(> t )      |
|-----------------------------------------|----------|------------|---------|---------------|
| <b>Total cholesterol</b>                |          |            |         |               |
| Continuous PRS * Intermediate lifestyle | 0.0130   | 0.0062     | 2.0864  | 0.0369        |
| Continuous PRS * Poor lifestyle         | 0.0166   | 0.0102     | 1.6272  | 0.1037        |
| 5%-10% PRS * Intermediate lifestyle     | -0.0328  | 0.0401     | -0.8194 | 0.4125        |
| 5%-10% PRS * Poor lifestyle             | -0.0247  | 0.0630     | -0.3925 | 0.6947        |
| 10-20% PRS * Intermediate lifestyle     | 0.0020   | 0.0346     | 0.0592  | 0.9528        |
| 10-20% PRS * Poor lifestyle             | -0.0089  | 0.0552     | -0.1606 | 0.8724        |
| 20-40% PRS * Intermediate lifestyle     | 0.0186   | 0.0316     | 0.5866  | 0.5575        |
| 20-40% PRS * Poor lifestyle             | 0.0507   | 0.0500     | 1.0135  | 0.3108        |
| 40-60% PRS * Intermediate lifestyle     | 0.0626   | 0.0316     | 1.9806  | 0.0476        |
| 40-60% PRS * Poor lifestyle             | 0.1013   | 0.0503     | 2.0148  | 0.0439        |
| 60-80% PRS * Intermediate lifestyle     | 0.0354   | 0.0315     | 1.1231  | 0.2614        |
| 60-80% PRS * Poor lifestyle             | 0.0829   | 0.0502     | 1.6505  | 0.0988        |
| 80-90% PRS * Intermediate lifestyle     | 0.0350   | 0.0345     | 1.0155  | 0.3099        |
| 80-90% PRS * Poor lifestyle             | 0.0688   | 0.0553     | 1.2456  | 0.2129        |
| 90-95% PRS * Intermediate lifestyle     | 0.0116   | 0.0394     | 0.2944  | 0.7685        |
| 90-95% PRS * Poor lifestyle             | -0.0249  | 0.0653     | -0.3812 | 0.7031        |
| 95-99% PRS * Intermediate lifestyle     | 0.0297   | 0.0413     | 0.7195  | 0.4718        |
| 95-99% PRS * Poor lifestyle             | 0.0331   | 0.0681     | 0.4862  | 0.6268        |
| >99% PRS * Intermediate lifestyle       | 0.0747   | 0.0697     | 1.0722  | 0.2836        |
| >99% PRS * Poor lifestyle               | 0.1691   | 0.1160     | 1.4578  | 0.1449        |
| <b>Triglyceride</b>                     |          |            |         |               |
| Continuous PRS * Intermediate lifestyle | 0.0191   | 0.0063     | 3.0025  | <b>0.0027</b> |
| Continuous PRS * Poor lifestyle         | 0.0203   | 0.0105     | 1.9391  | 0.0525        |
| 5%-10% PRS * Intermediate lifestyle     | 0.0004   | 0.0400     | 0.0108  | 0.9914        |
| 5%-10% PRS * Poor lifestyle             | -0.0132  | 0.0663     | -0.1994 | 0.8420        |
| 10-20% PRS * Intermediate lifestyle     | 0.0943   | 0.0346     | 2.7222  | 0.0065        |
| 10-20% PRS * Poor lifestyle             | 0.0459   | 0.0574     | 0.8006  | 0.4234        |
| 20-40% PRS * Intermediate lifestyle     | 0.0782   | 0.0315     | 2.4850  | 0.0130        |
| 20-40% PRS * Poor lifestyle             | 0.0544   | 0.0525     | 1.0371  | 0.2997        |
| 40-60% PRS * Intermediate lifestyle     | 0.0911   | 0.0314     | 2.8958  | 0.0038        |
| 40-60% PRS * Poor lifestyle             | 0.0558   | 0.0525     | 1.0636  | 0.2875        |
| 60-80% PRS * Intermediate lifestyle     | 0.0913   | 0.0315     | 2.9021  | 0.0037        |
| 60-80% PRS * Poor lifestyle             | 0.0791   | 0.0525     | 1.5063  | 0.1320        |
| 80-90% PRS * Intermediate lifestyle     | 0.0748   | 0.0345     | 2.1688  | 0.0301        |
| 80-90% PRS * Poor lifestyle             | 0.0552   | 0.0573     | 0.9634  | 0.3353        |
| 90-95% PRS * Intermediate lifestyle     | 0.0971   | 0.0401     | 2.4198  | 0.0155        |
| 90-95% PRS * Poor lifestyle             | 0.1051   | 0.0661     | 1.5913  | 0.1115        |
| 95-99% PRS * Intermediate lifestyle     | 0.1206   | 0.0422     | 2.8584  | 0.0043        |
| 95-99% PRS * Poor lifestyle             | 0.0673   | 0.0707     | 0.9508  | 0.3417        |
| >99% PRS * Intermediate lifestyle       | 0.1192   | 0.0689     | 1.7295  | 0.0837        |
| >99% PRS * Poor lifestyle               | 0.1083   | 0.1154     | 0.9382  | 0.3481        |

| LDL-cholesterol                         |         |        |         |        |
|-----------------------------------------|---------|--------|---------|--------|
| Continuous PRS * Intermediate lifestyle | 0.0127  | 0.0063 | 2.0079  | 0.0447 |
| Continuous PRS * Poor lifestyle         | 0.0112  | 0.0104 | 1.0825  | 0.2790 |
| 5%-10% PRS * Intermediate lifestyle     | 0.0064  | 0.0404 | 0.1591  | 0.8736 |
| 5%-10% PRS * Poor lifestyle             | 0.0258  | 0.0647 | 0.3992  | 0.6898 |
| 10-20% PRS * Intermediate lifestyle     | 0.0405  | 0.0353 | 1.1463  | 0.2517 |
| 10-20% PRS * Poor lifestyle             | 0.0498  | 0.0558 | 0.8925  | 0.3721 |
| 20-40% PRS * Intermediate lifestyle     | 0.0453  | 0.0322 | 1.4081  | 0.1591 |
| 20-40% PRS * Poor lifestyle             | 0.0765  | 0.0511 | 1.4967  | 0.1345 |
| 40-60% PRS * Intermediate lifestyle     | 0.0466  | 0.0321 | 1.4517  | 0.1466 |
| 40-60% PRS * Poor lifestyle             | 0.0936  | 0.0511 | 1.8315  | 0.0670 |
| 60-80% PRS * Intermediate lifestyle     | 0.0934  | 0.0321 | 2.9106  | 0.0036 |
| 60-80% PRS * Poor lifestyle             | 0.1114  | 0.0511 | 2.1788  | 0.0294 |
| 80-90% PRS * Intermediate lifestyle     | 0.0597  | 0.0350 | 1.7039  | 0.0884 |
| 80-90% PRS * Poor lifestyle             | 0.0800  | 0.0566 | 1.4131  | 0.1576 |
| 90-95% PRS * Intermediate lifestyle     | 0.0195  | 0.0402 | 0.4857  | 0.6272 |
| 90-95% PRS * Poor lifestyle             | 0.0279  | 0.0651 | 0.4289  | 0.6680 |
| 95-99% PRS * Intermediate lifestyle     | 0.0290  | 0.0421 | 0.6892  | 0.4907 |
| 95-99% PRS * Poor lifestyle             | -0.0209 | 0.0698 | -0.2987 | 0.7652 |
| >99% PRS * Intermediate lifestyle       | 0.1141  | 0.0691 | 1.6517  | 0.0986 |
| >99% PRS * Poor lifestyle               | -0.0226 | 0.1199 | -0.1888 | 0.8502 |

**Supplementary Figure 1.** Flowchart for the selection of the study samples from the UK Biobank

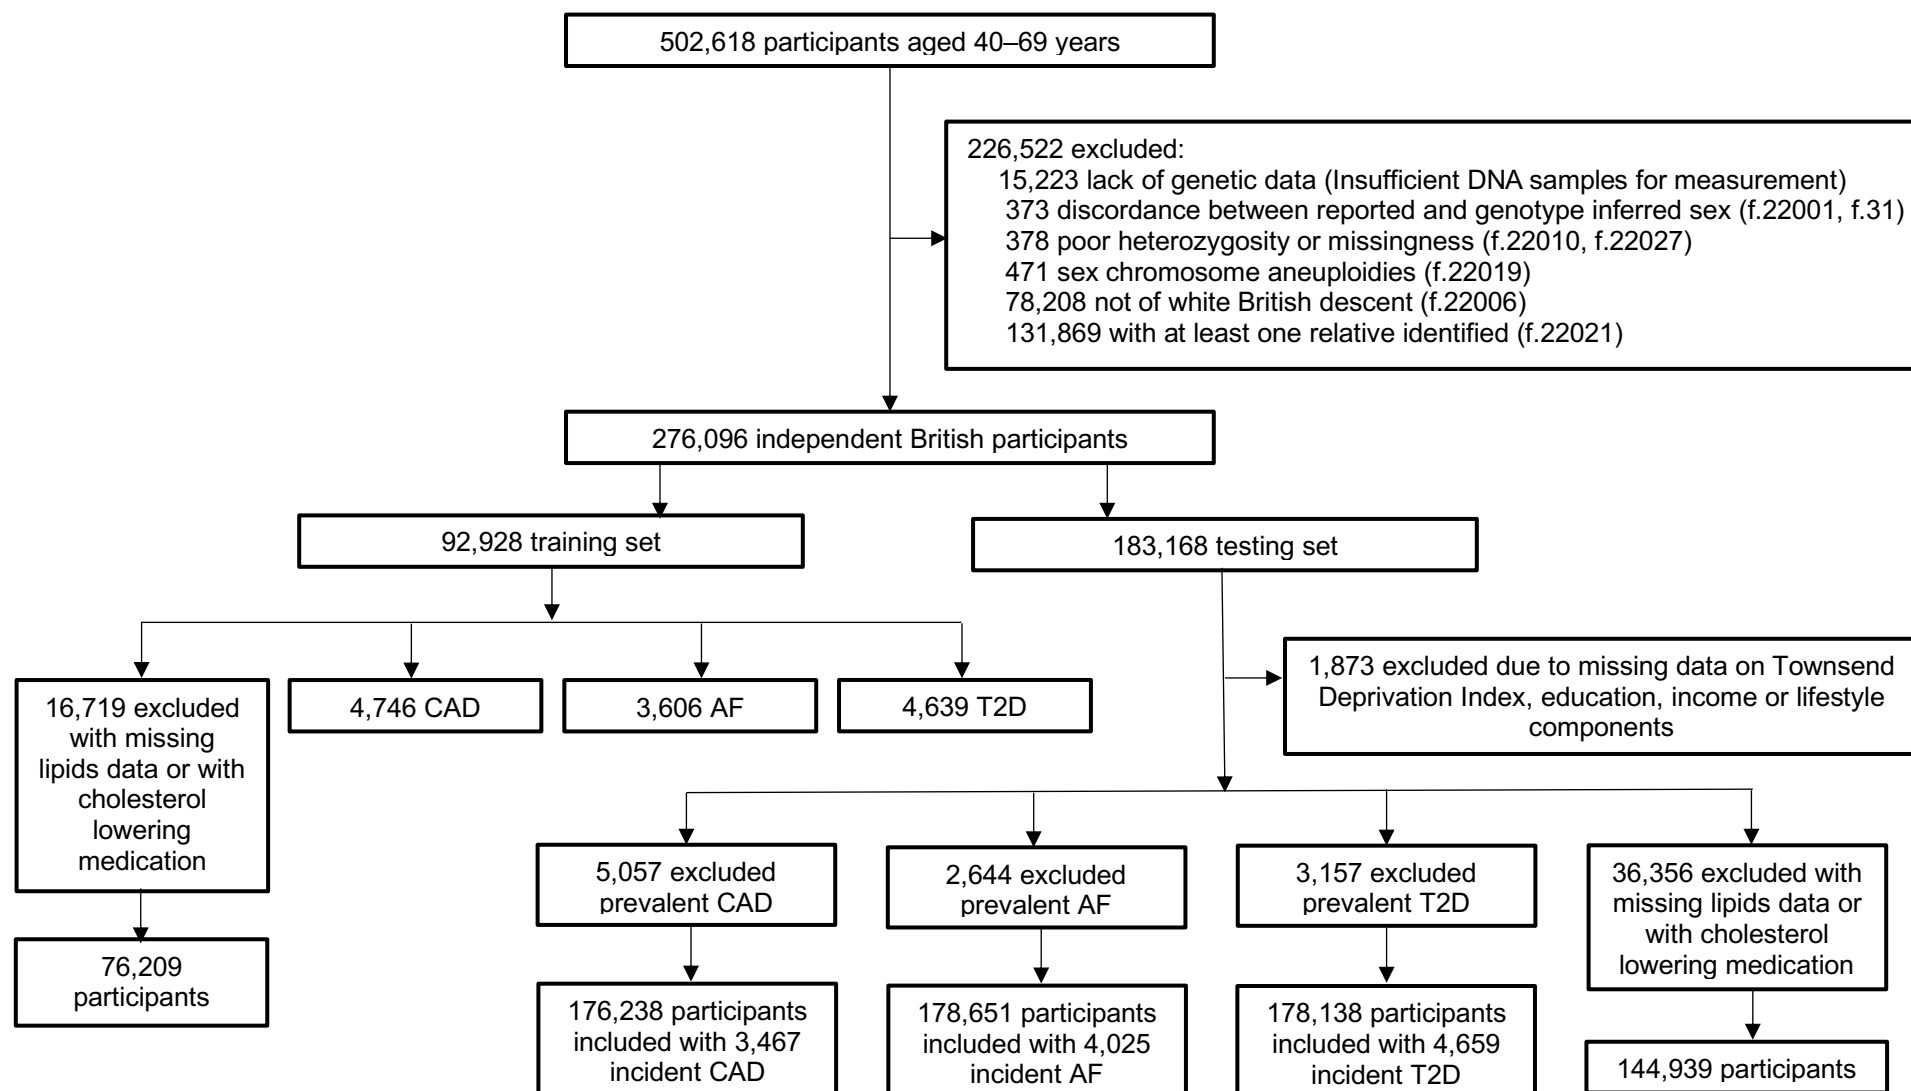

CAD, coronary artery disease; AF, atrial fibrillation; T2D, type 2 diabetes.

**Supplementary Figure 2.** Flowchart for PRS derivation.

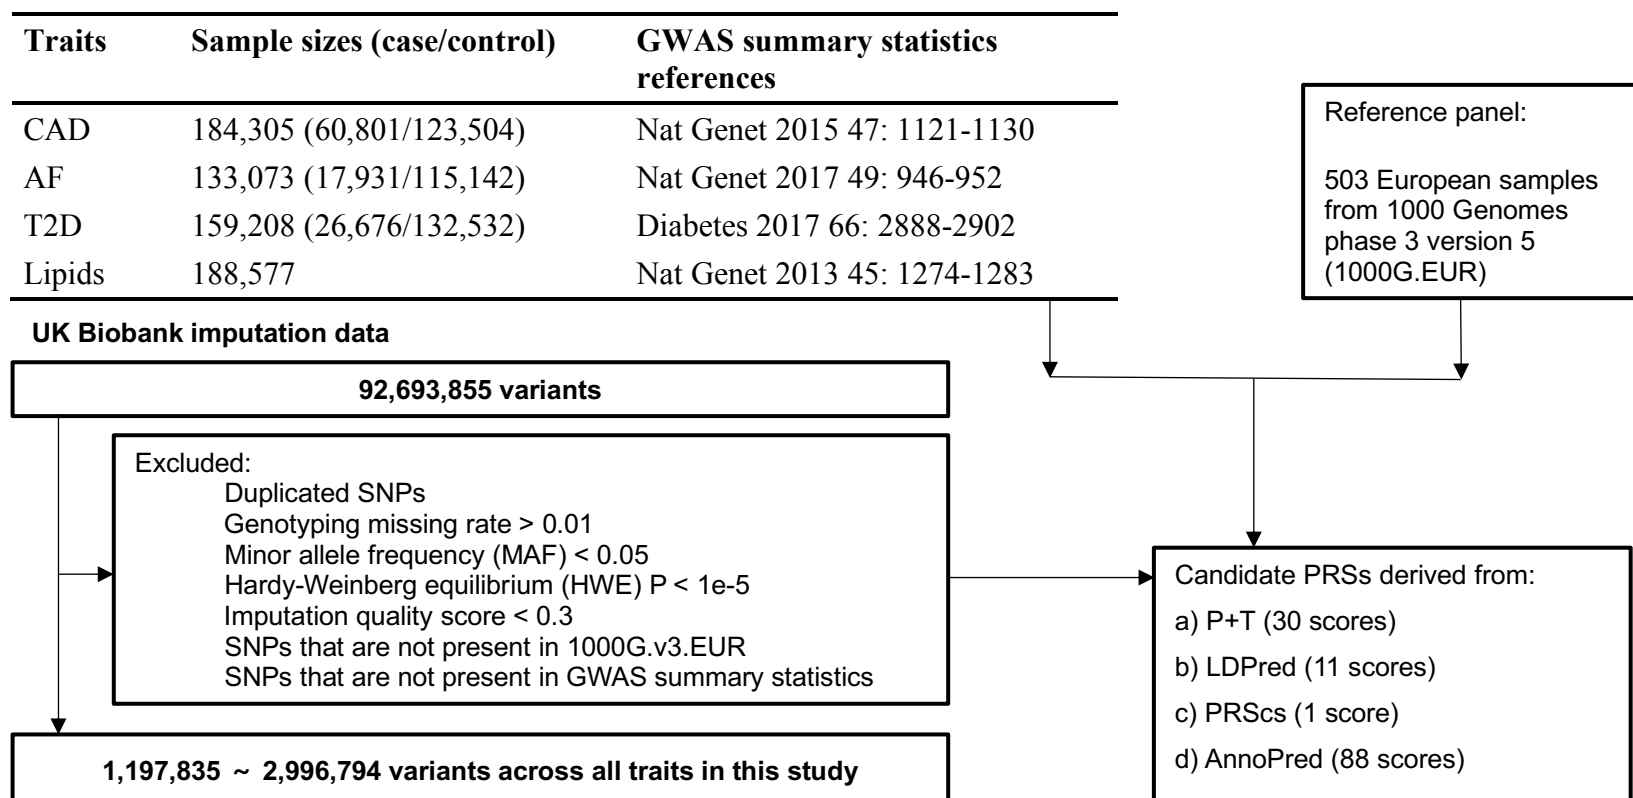

130 candidate PRSs for each disease were derived by combining external large scale GWAS summary statistics and an LD reference panel of 503 Europeans using four methods: a) P+T, b) LDpred, c) PRS-CS and d) AnnoPred. For each disease, the 130 candidate PRSs were calculated in the UK Biobank training dataset by summing across the weighted variants using PLINK2. We only kept variants shared by GWAS summary statistics and reference panel and further excluded the duplicated variants and variants whose genotyping missing rate > 0.01, minor allele frequency < 0.05, Hardy-Weinberg equilibrium P value < 1e-5, or imputation quality score < 0.3.

**Supplementary Figure 3.** Relative risk of coronary artery disease stratified by genetic and individual lifestyle factors.

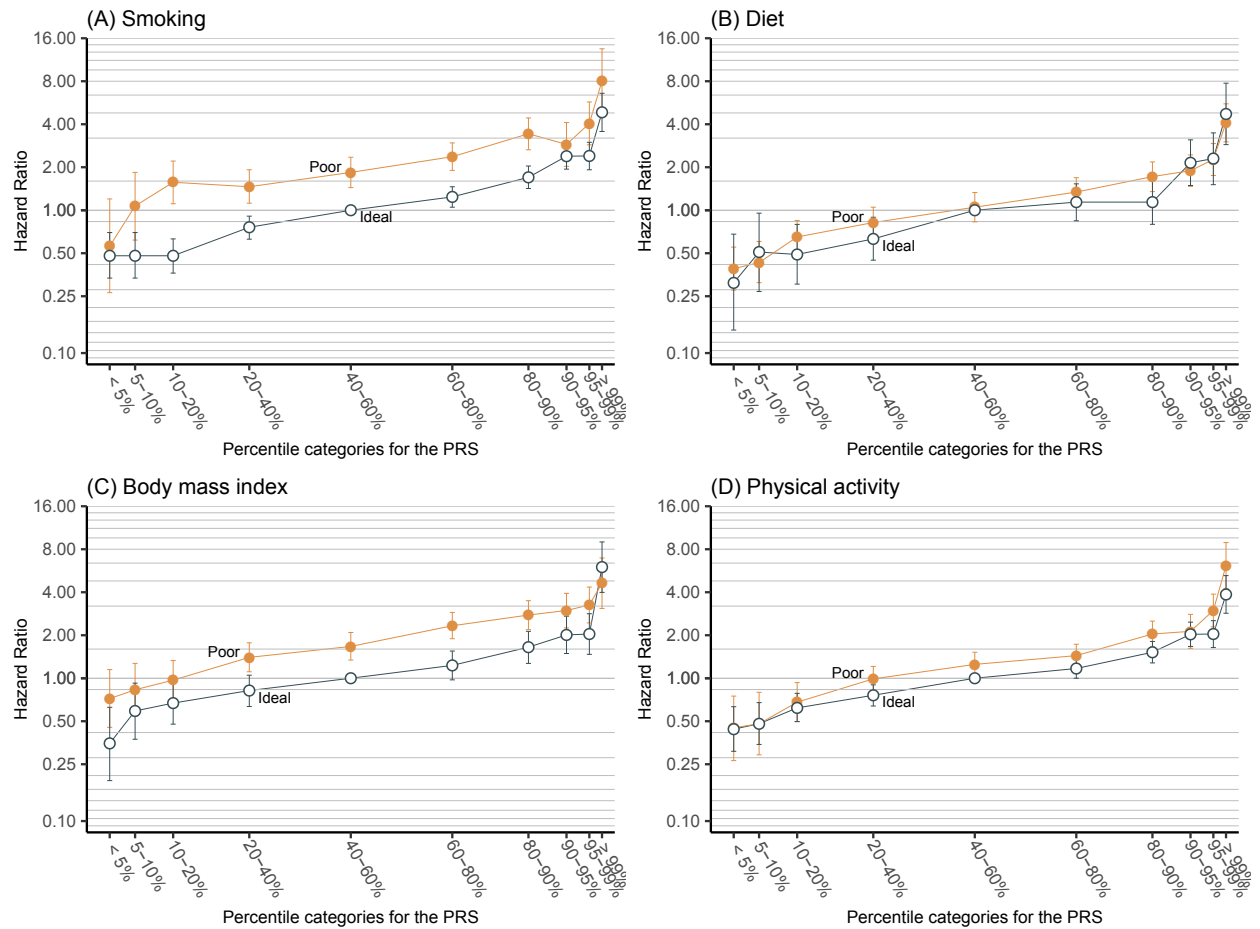

We partitioned the testing set into 20 groups according to their PRS percentile (10 genetic risk bins) and individual lifestyle status (two lifestyle bins). The hazard ratios were calculated by comparing each group to the group with intermediate PRS percentile (40%-60% PRS) and ideal individual lifestyle status. All hazard ratios were provided with their corresponding 95% CIs. Y-axis was on log-scale.

**Supplementary Figure 4.** Relative risk of atrial fibrillation stratified by genetic and individual lifestyle factors.

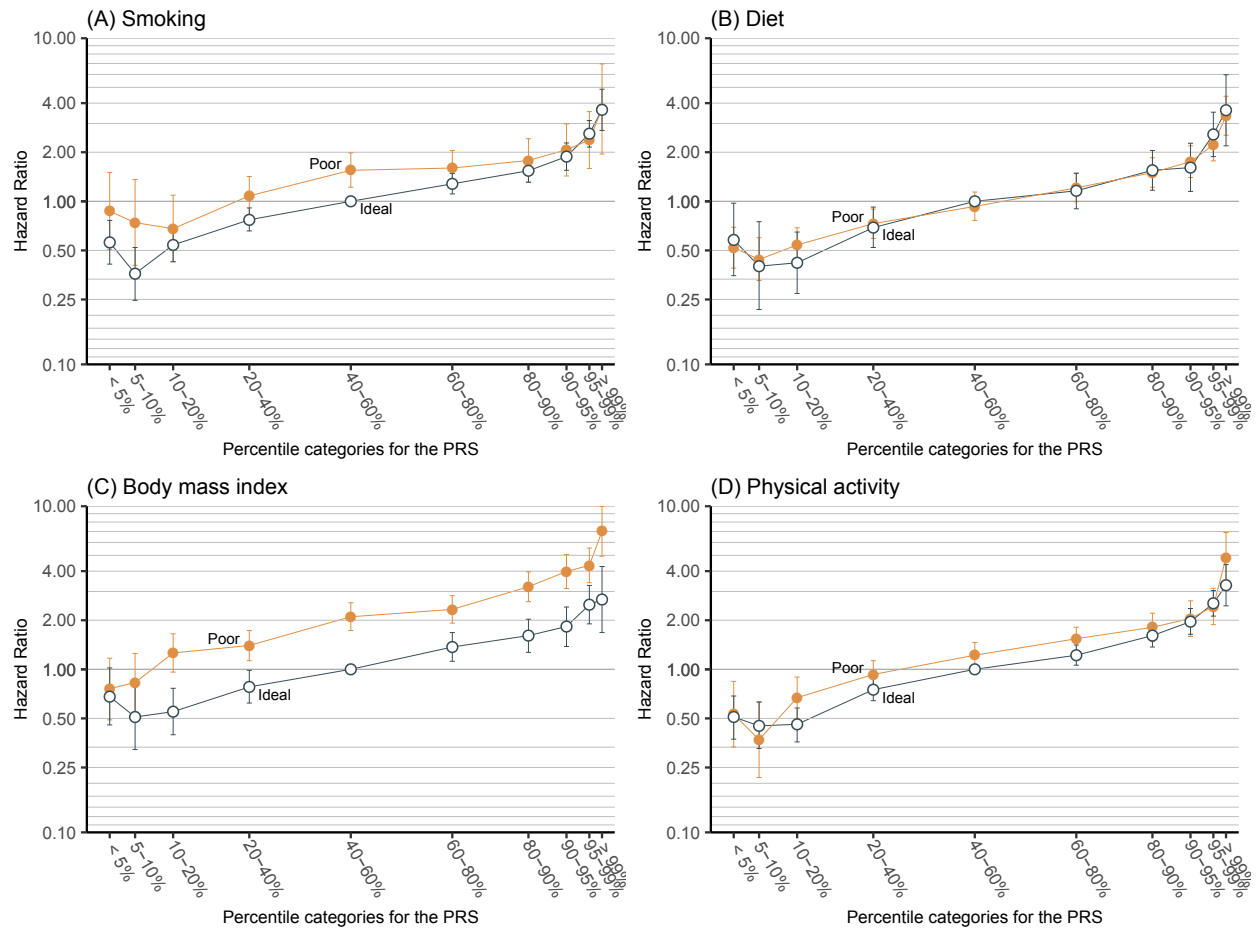

We partitioned the testing set into 20 groups according to their PRS percentile (10 genetic risk bins) and individual lifestyle status (two lifestyle bins). The hazard ratios were calculated by comparing each group to the group with intermediate PRS percentile (40%-60% PRS) and ideal individual lifestyle status. All hazard ratios were provided with their corresponding 95% CIs. Y-axis was on log-scale.

**Supplementary Figure 5.** Relative risk of type 2 diabetes stratified by genetic and individual lifestyle factors.

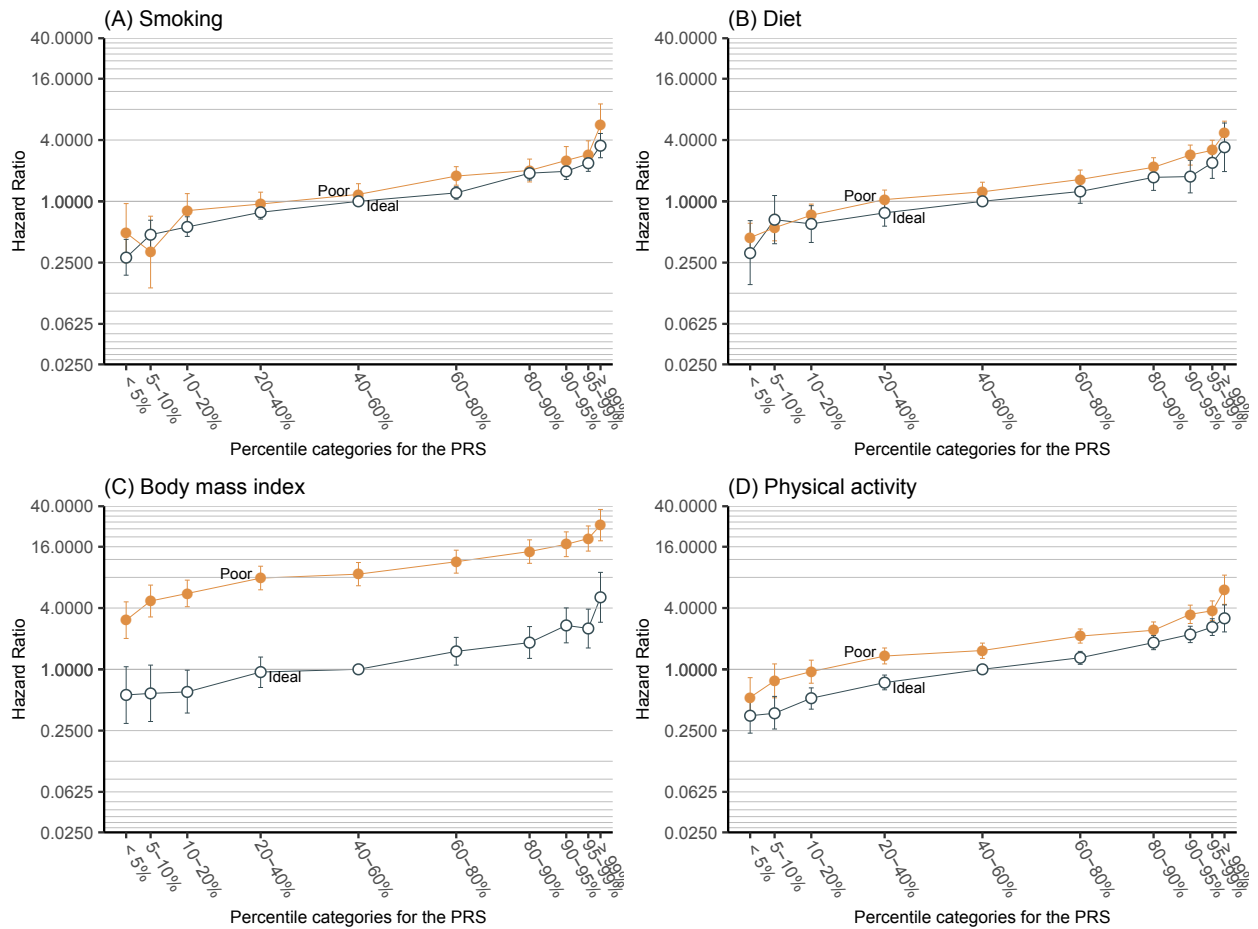

We partitioned the testing set into 20 groups according to their PRS percentile (10 genetic risk bins) and individual lifestyle status (two lifestyle bins). The hazard ratios were calculated by comparing each group to the group with intermediate PRS percentile (40%-60% PRS) and ideal individual lifestyle status. All hazard ratios were provided with their corresponding 95% CIs. Y-axis was on log-scale.

**Supplementary Figure 6.** Absolute risk of coronary artery disease stratified by genetic and individual lifestyle factors.

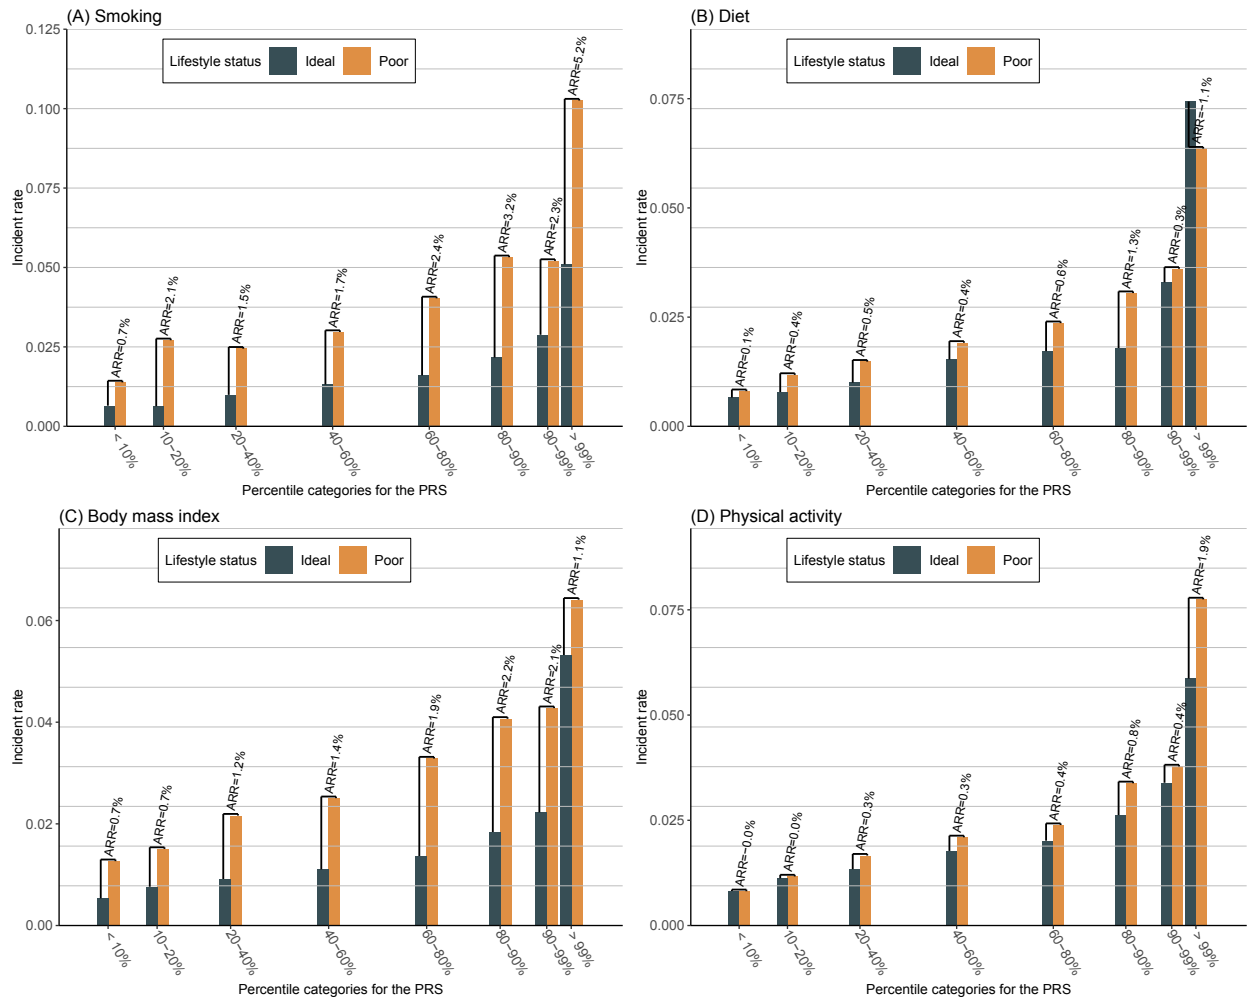

We partitioned the testing set into 20 groups according to their PRS percentile (10 genetic risk bins) and individual lifestyle status (two lifestyle bins). The absolute risk in each group was calculated as the incident rate of each disease in the group, and the absolute risk reduction (ARR) reflected the reduction of absolute risk when changing the individual lifestyle status from poor to ideal within the same PRS group.



**Supplementary Figure 7.** Absolute risk of atrial fibrillation stratified by genetic and individual lifestyle factors.

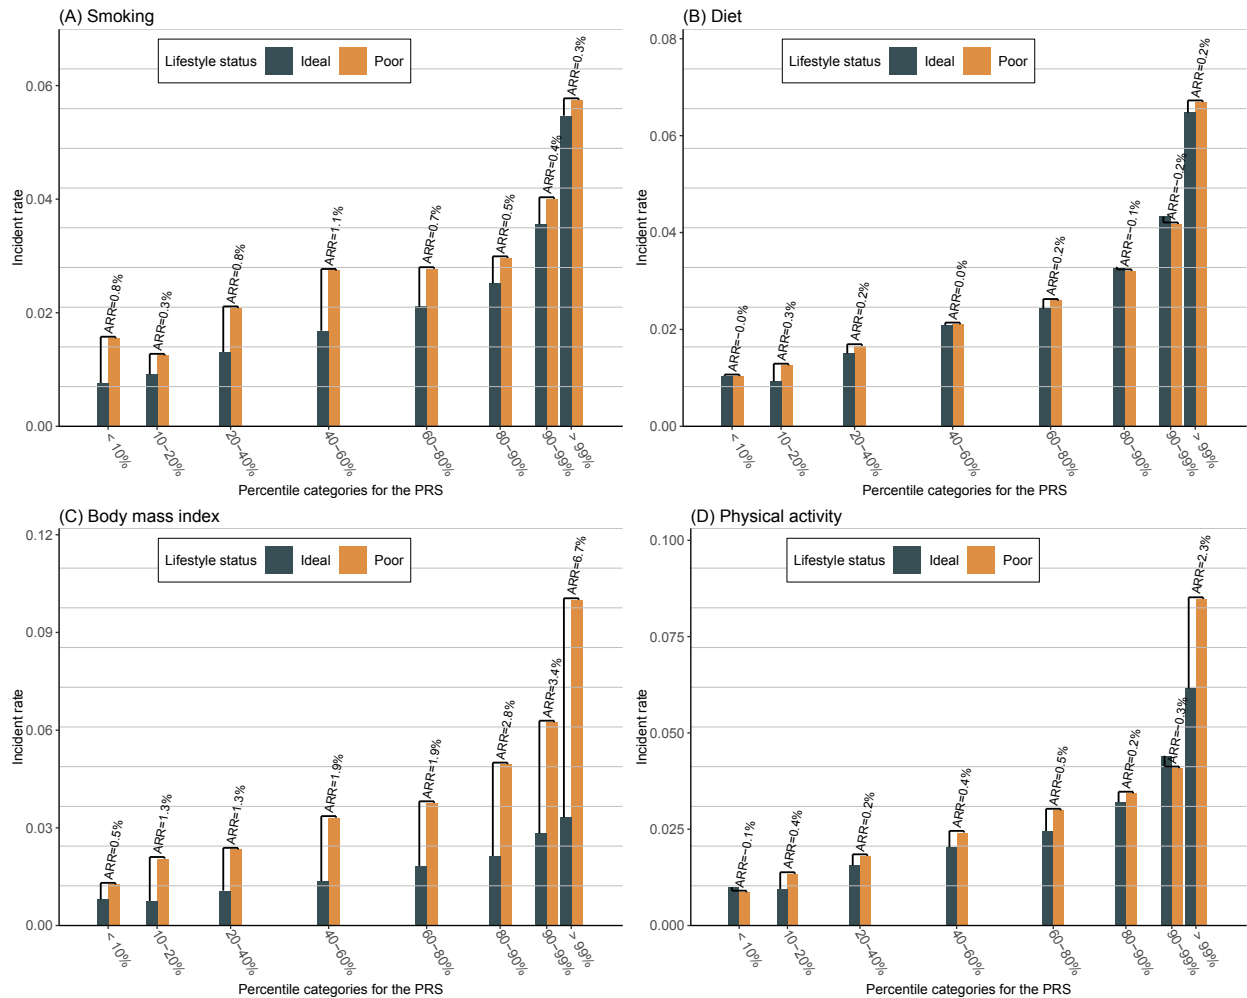

We partitioned the testing set into 20 groups according to their PRS percentile (10 genetic risk bins) and individual lifestyle status (two lifestyle bins). The absolute risk in each group was calculated as the incident rate of each disease in the group, and the absolute risk reduction (ARR) reflected the reduction of absolute risk when changing the individual lifestyle status from poor to ideal within the same PRS group.

**Supplementary Figure 8.** Absolute risk of type 2 diabetes stratified by genetic and individual lifestyle factors.

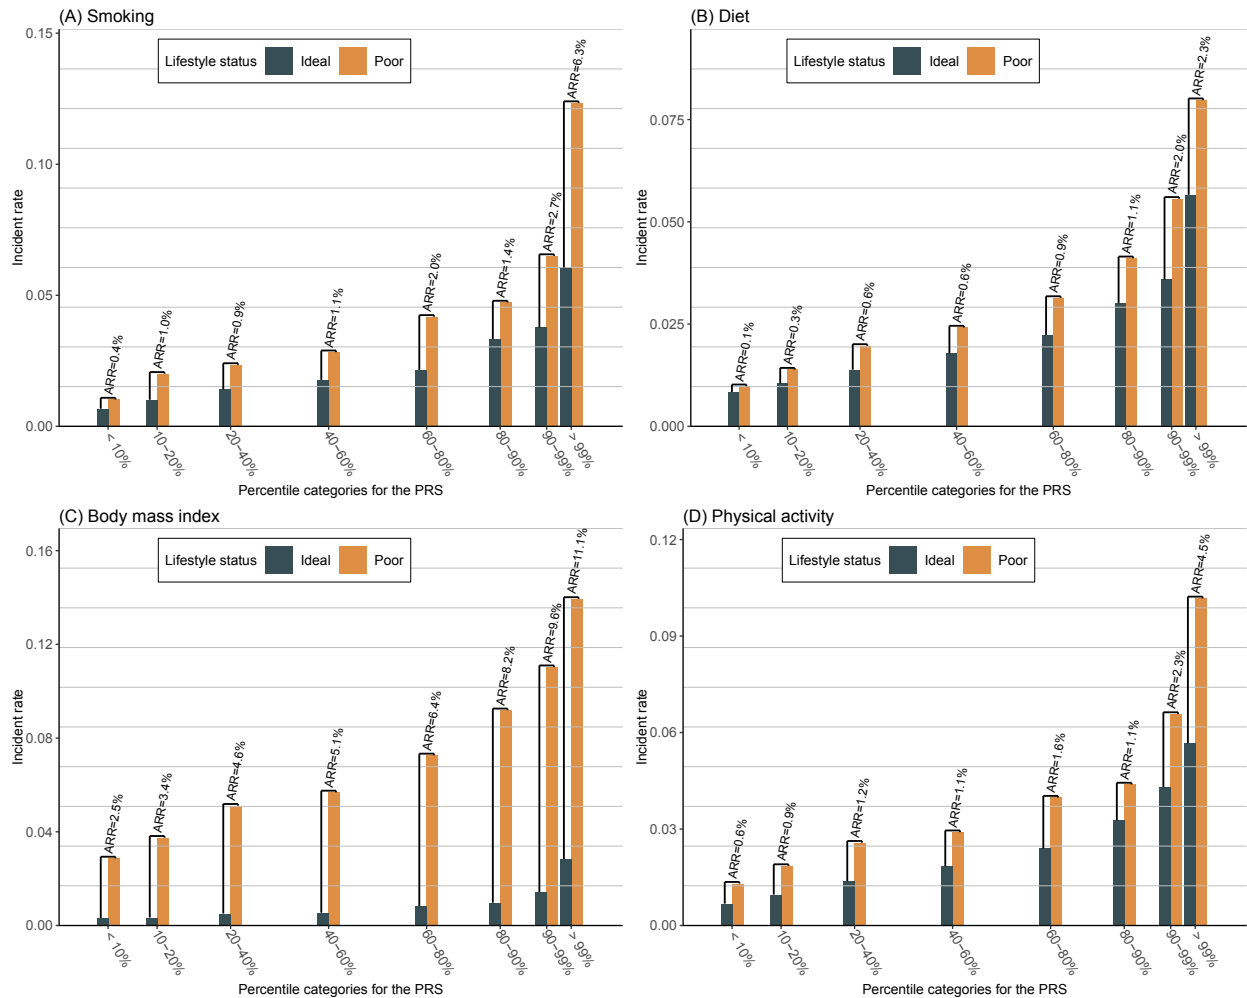

We partitioned the testing set into 20 groups according to their PRS percentile (10 genetic risk bins) and individual lifestyle status (two lifestyle bins). The absolute risk in each group was calculated as the incident rate of each disease in the group, and the absolute risk reduction (ARR) reflected the reduction of absolute risk when changing the individual lifestyle status from poor to ideal within the same PRS group.

**Supplementary Figure 9.** Levels of total cholesterol stratified by genetic and individual lifestyle factors.

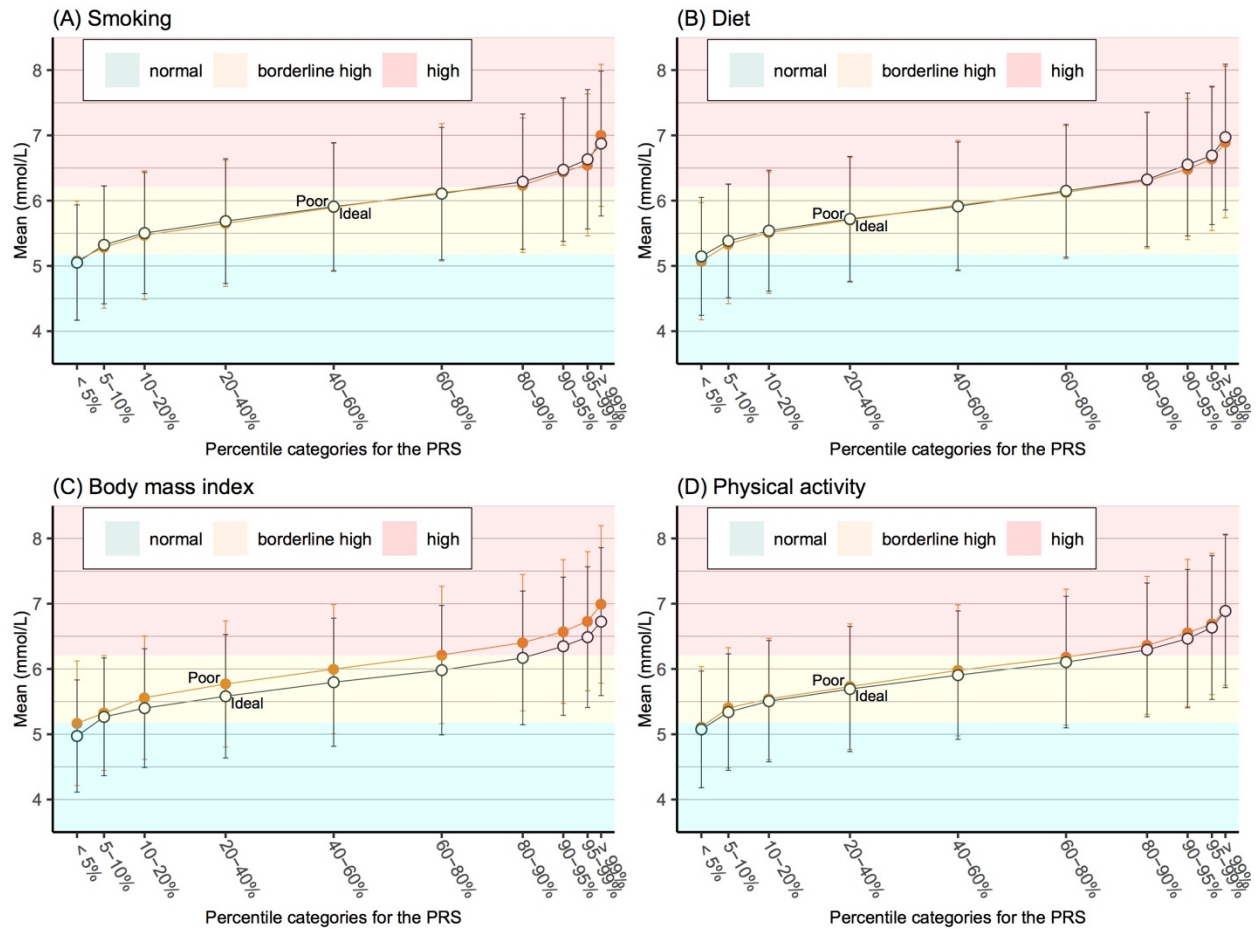

We partitioned the testing set into 20 groups according to their PRS percentile (10 genetic risk bins) and individual lifestyle status (two lifestyle bins). The mean level of total cholesterol in each group was provided with its associated standard error. Different background color indicated different designation according to the recommended guidelines set by the NCEP. Green, yellow and red indicated normal, border high, and high designation, respectively

**Supplementary Figure 10.** Levels of triglyceride stratified by genetic and individual lifestyle factors.

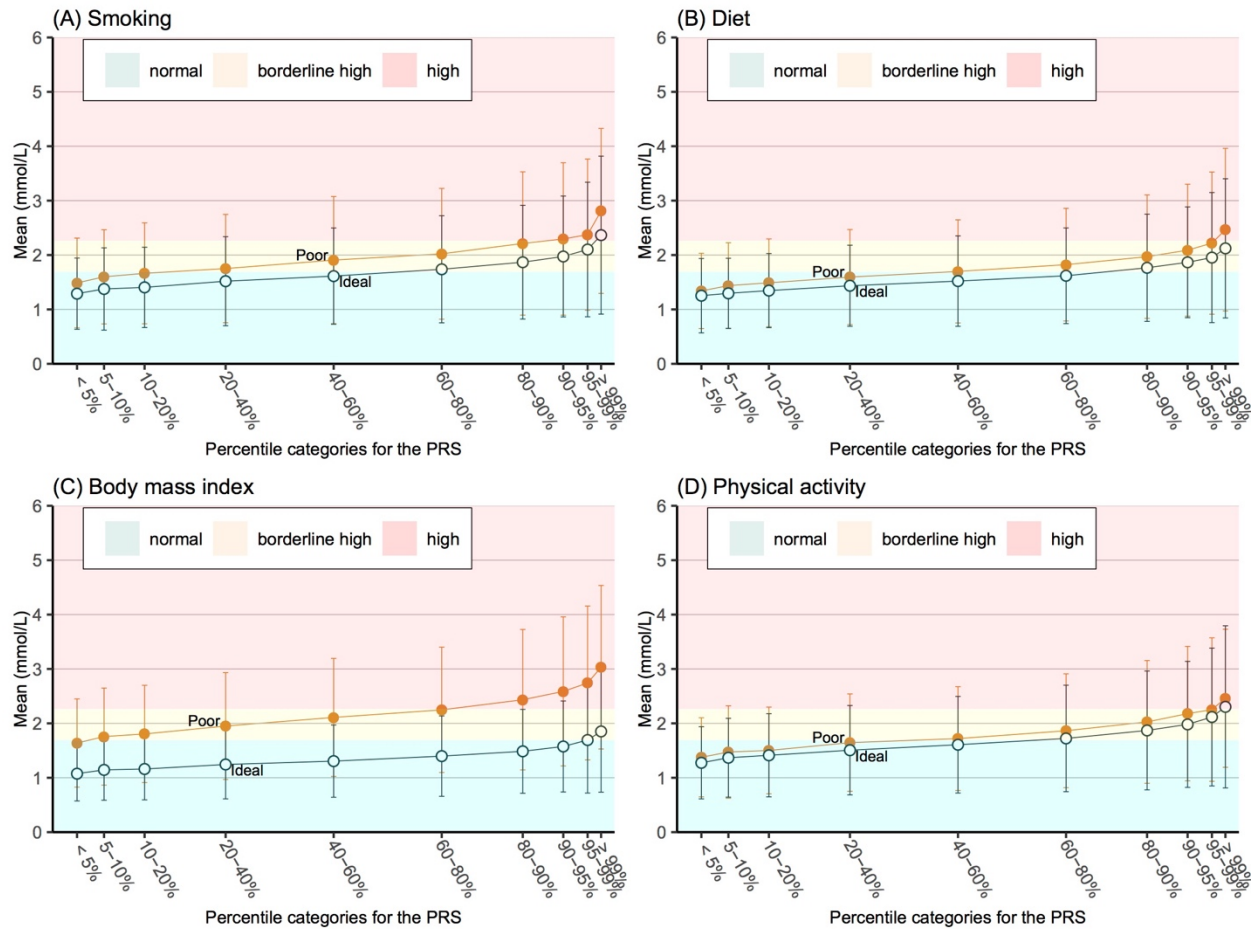

We partitioned the testing set into 20 groups according to their PRS percentile (10 genetic risk bins) and individual lifestyle status (two lifestyle bins). The mean level of triglyceride in each group was provided with its associated standard error. Different background color indicated different designation according to the recommended guidelines set by the NCEP. Green, yellow and red indicated normal, border high, and high designation, respectively.

**Supplementary Figure 11.** Levels of LDL-cholesterol stratified by genetic and individual lifestyle factors.

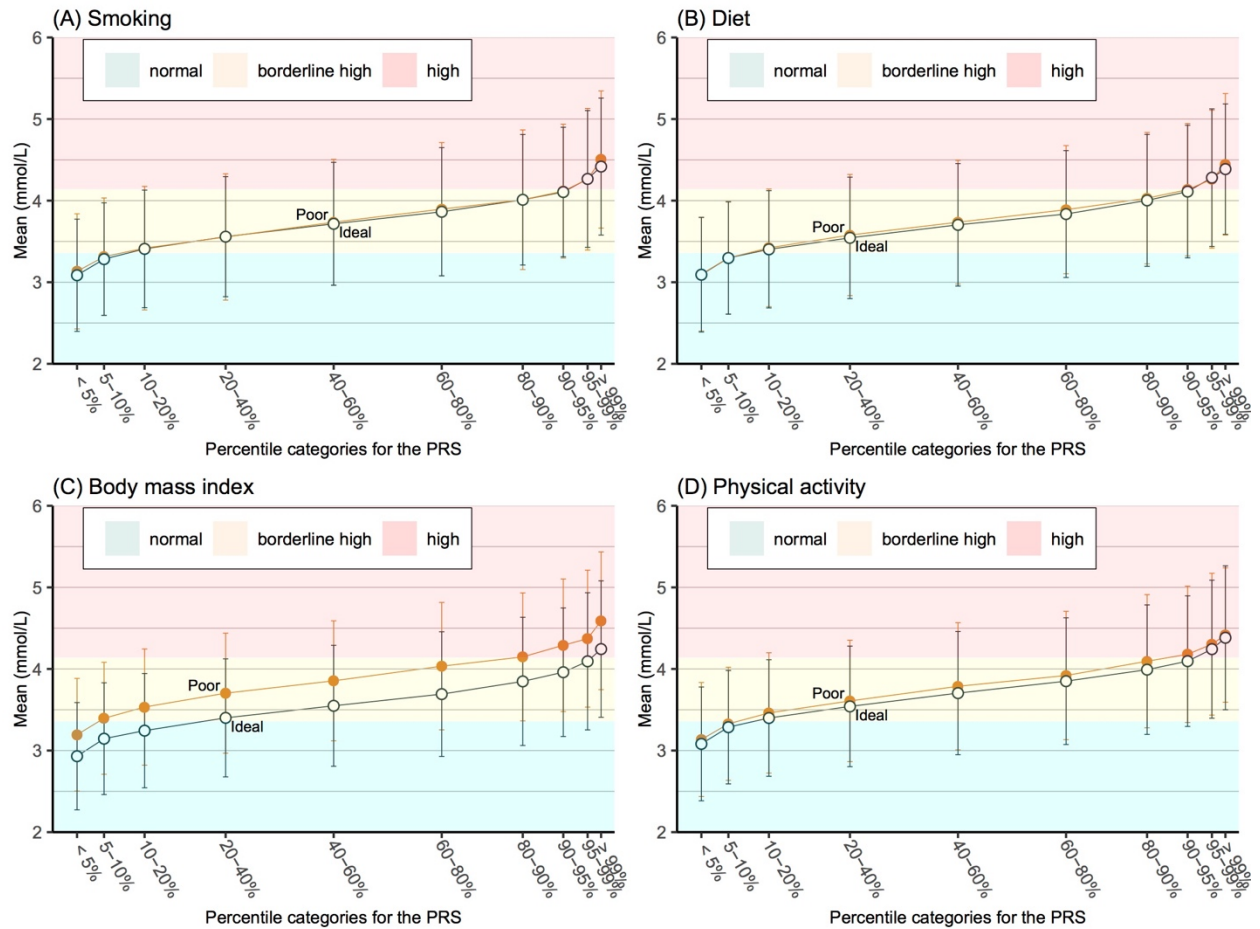

We partitioned the testing set into 20 groups according to their PRS percentile (10 genetic risk bins) and individual lifestyle status (two lifestyle bins). The mean level of LDL-cholesterol in each group was provided with its associated standard error. Different background color indicated different designation according to the recommended guidelines set by the NCEP. Green, yellow and red indicated normal, border high, and high designation, respectively.

**Supplementary Figure 12.** Relative risk of coronary artery disease, atrial fibrillation, and type 2 diabetes stratified by PRS and combined lifestyle in different sexes.

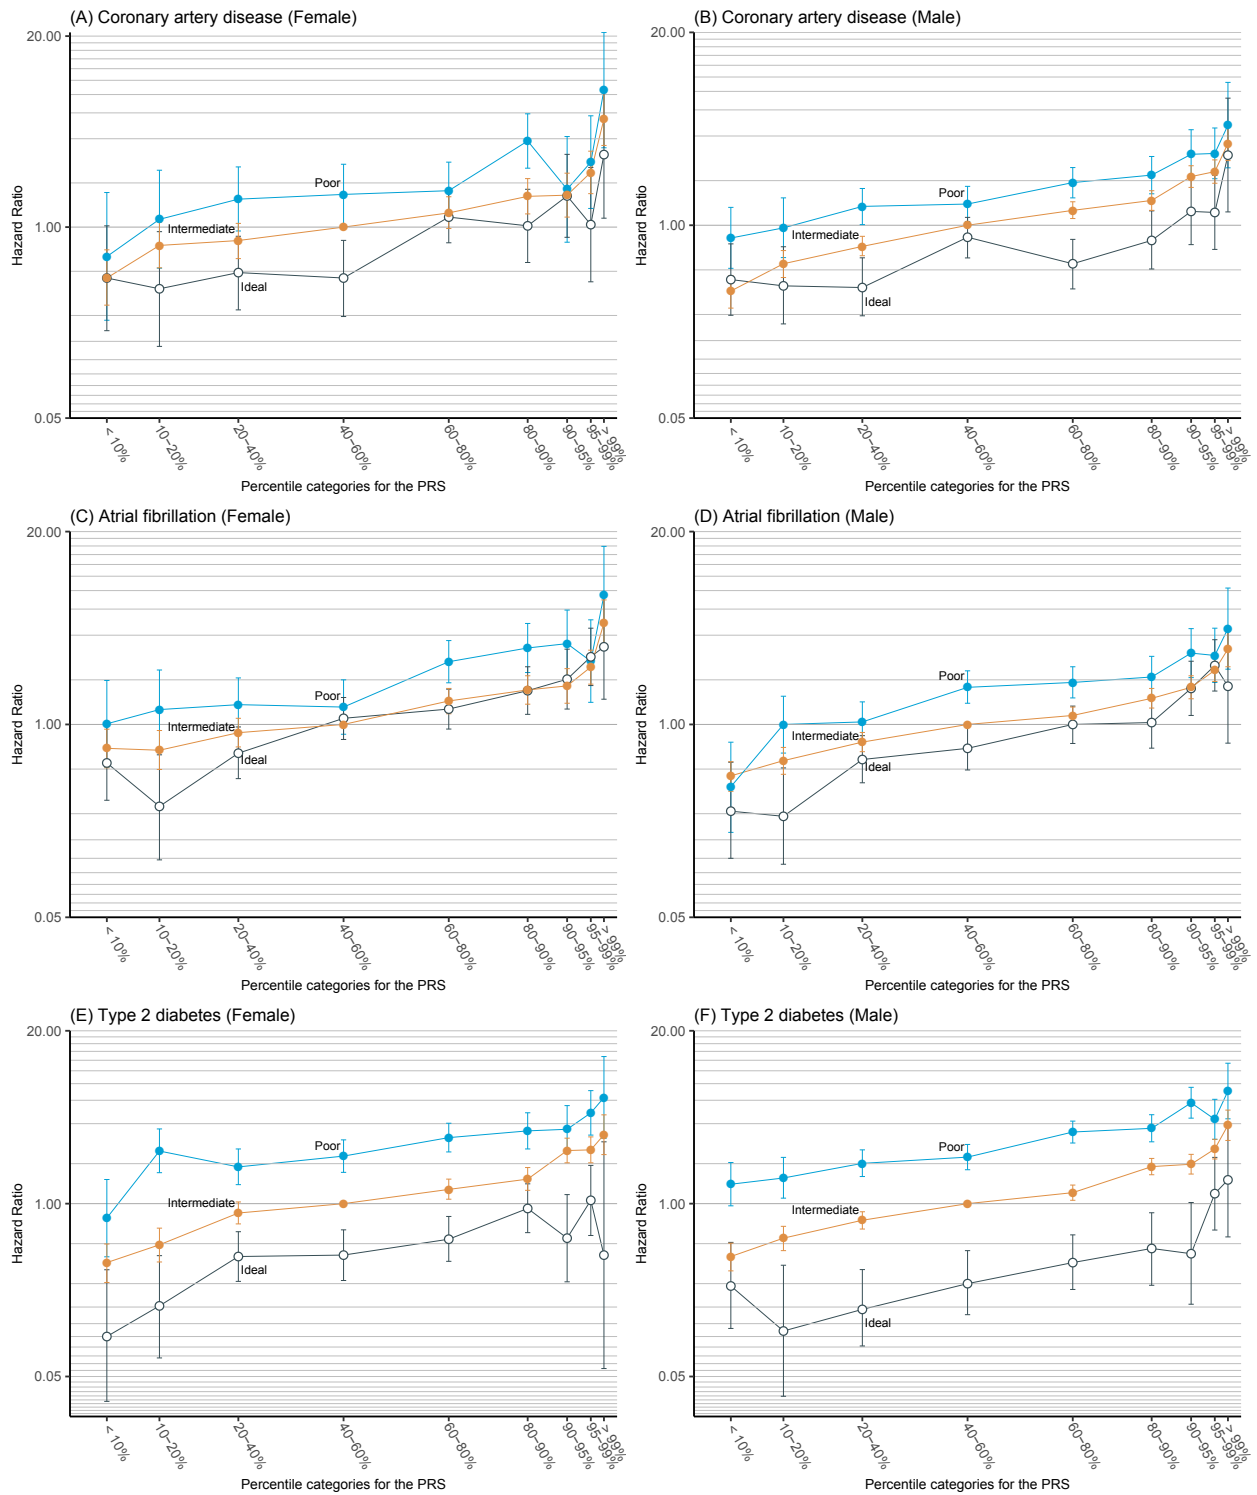

The testing set was stratified by sex and within each sex, we calculated the relative risk of coronary artery disease, atrial fibrillation, and type 2 diabetes stratified by the combination of PRS and combined lifestyle.

**Supplementary Figure 13.** Incident events of CAD, AF and T2D stratified by PRS and combined lifestyle in different sexes.

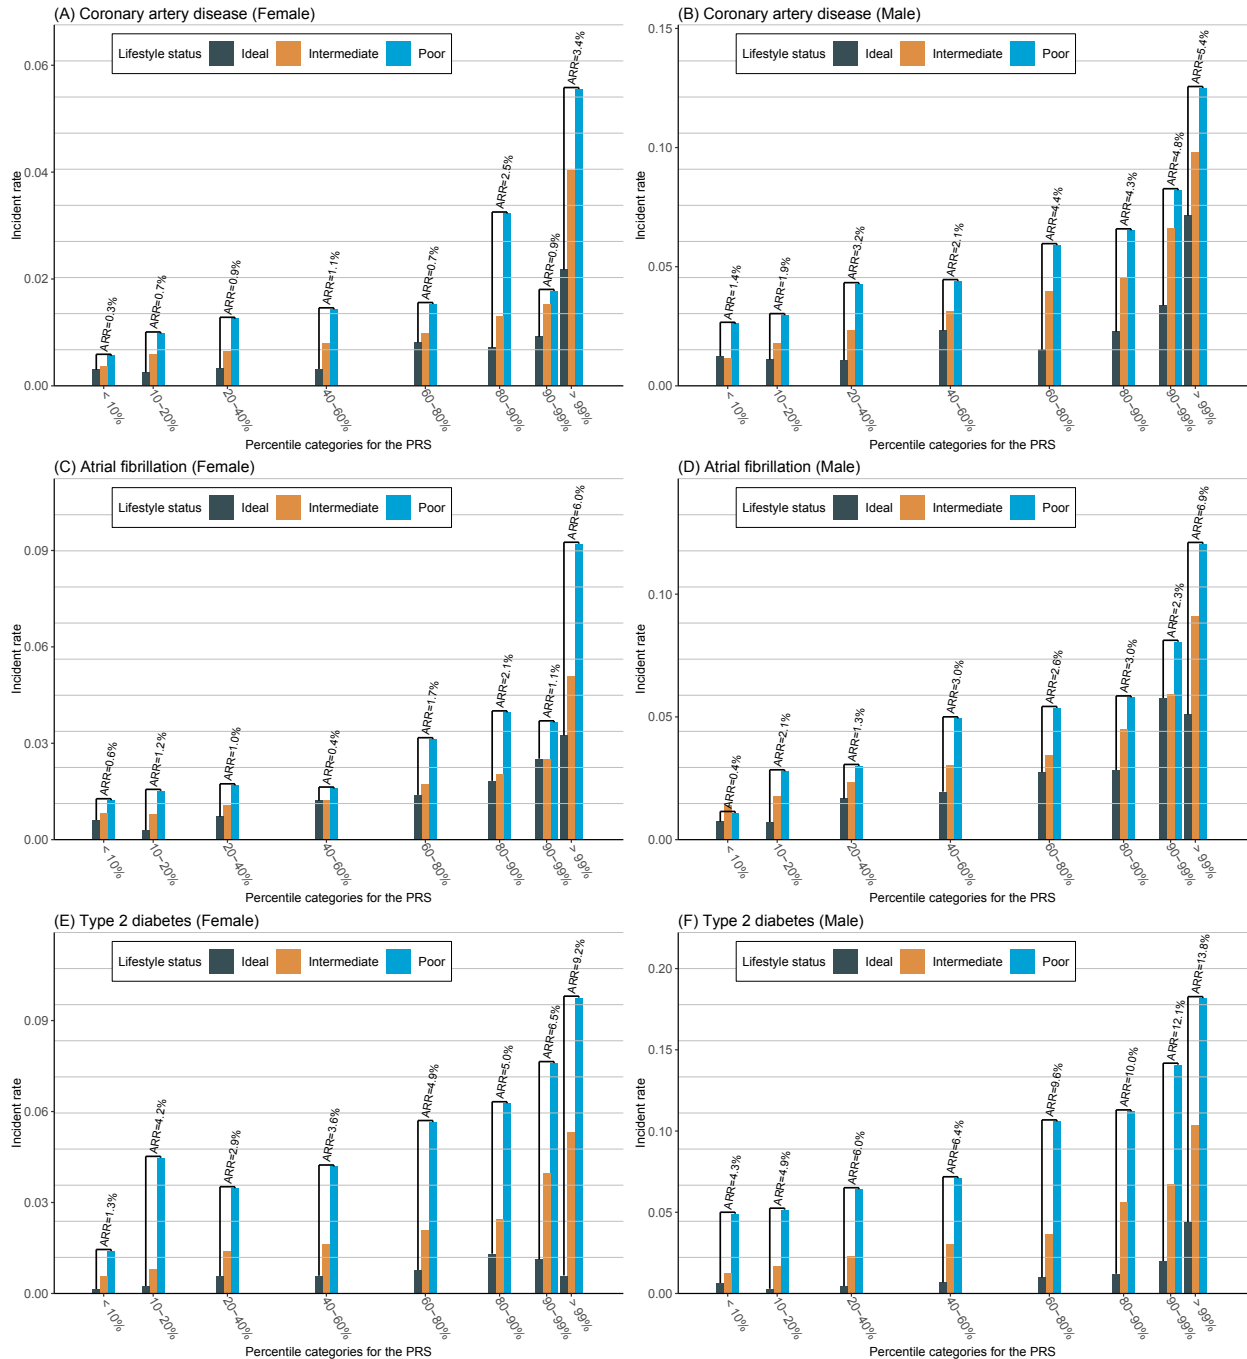

The testing set was stratified by sex and within each sex, we calculated absolute risk reduction as the difference of absolute risk between groups with poor and ideal lifestyle status within the same PRS percentiles.

**Supplementary Figure 14.** Lipid levels stratified by PRS and combined lifestyle in different sexes.

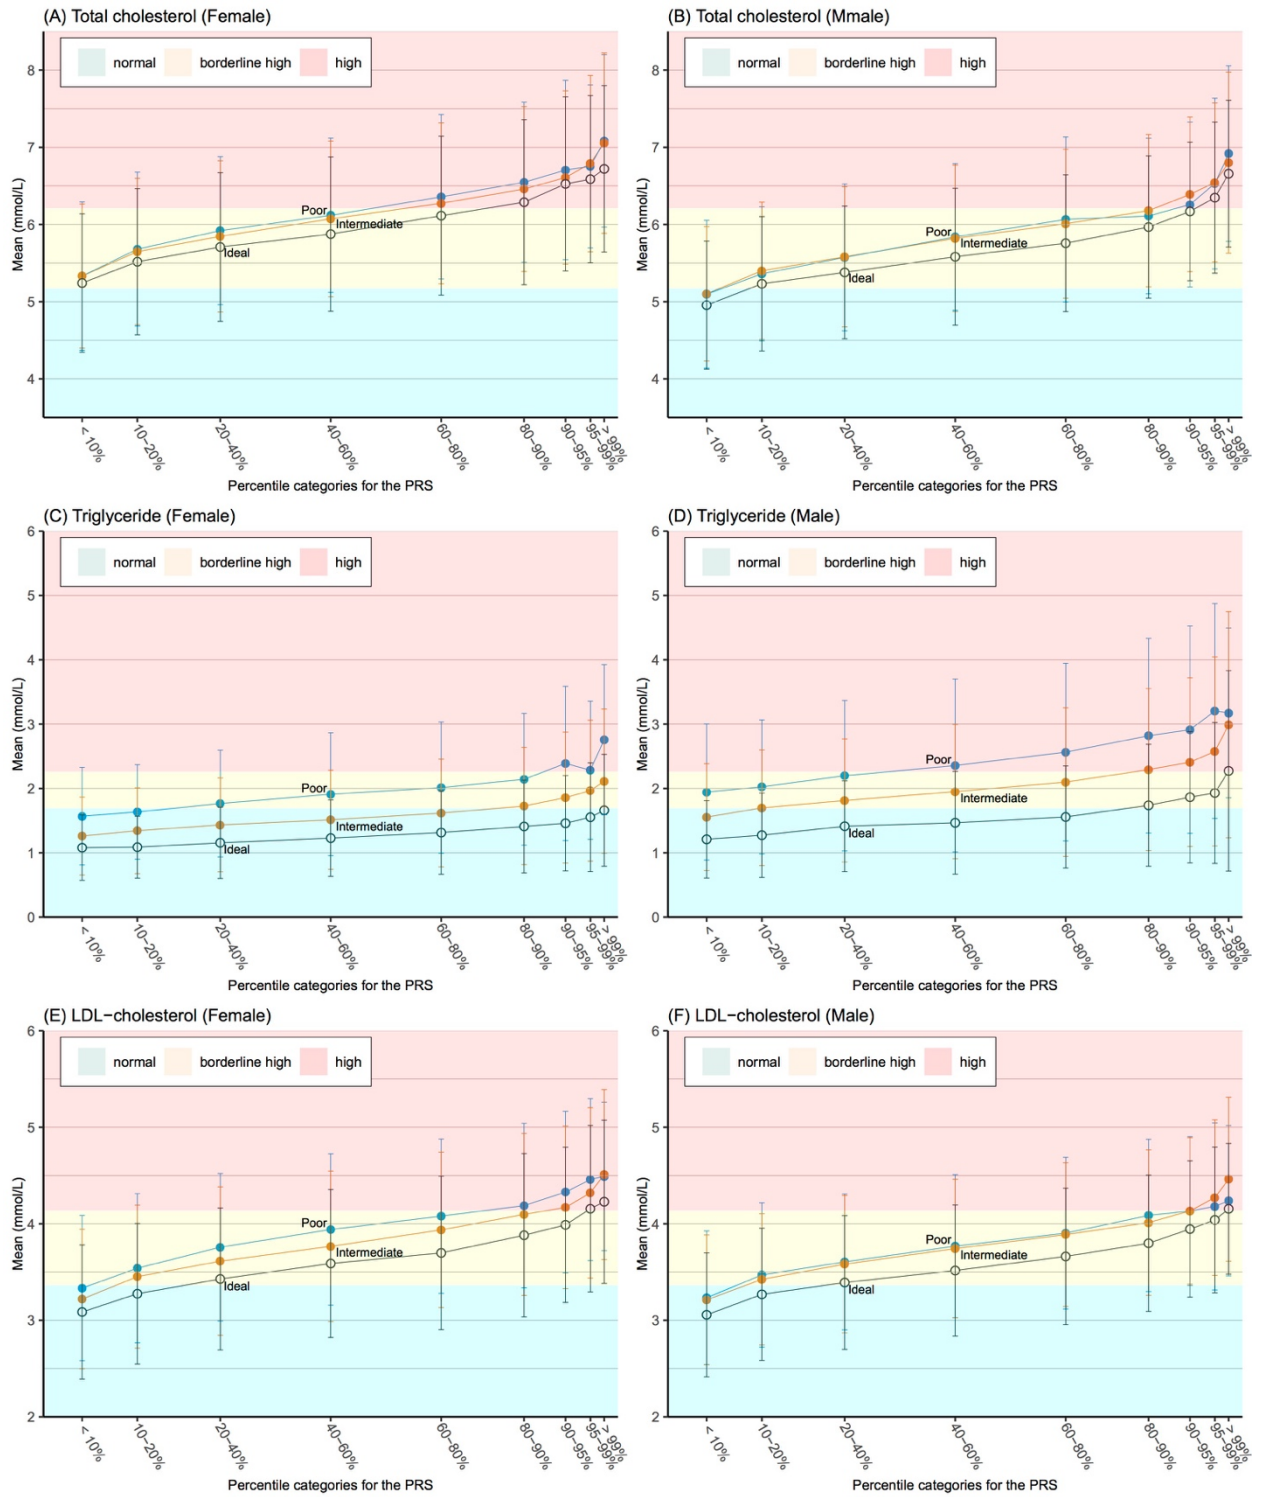

The testing set was stratified by sex and within each sex, we calculated the mean lipid levels stratified by the combination of PRS and combined lifestyle.
